# Supplementary material for: Degradation mechanisms of simple aliphatic amines under ozonation: a DFT study
Source: Royal Society of Chemistry journal article supplement (doi:10.1039/d0em00476f), 2021-01-01
Supplement: d0em00476f1.pdf [file d0em00476f1.pdf]

## Supporting Information

# Degradation mechanisms of simple aliphatic amines under ozonation: a DFT study

*Qunfang Shen, Yong Dong Liu\*, Rugang Zhong*

Beijing Key Laboratory of Environmental and Viral Oncology,  
College of Life Science & Bioengineering, Beijing University of Technology,  
Beijing 100124, China

\*Corresponding author. Phone: +86-10-6739-6211; fax: +86-10-6739-2001.

E-mail: [ydliu@bjut.edu.cn](mailto:ydliu@bjut.edu.cn).

95 Pages  
4 Tables  
3 Figures

81 Cartesian orientations of transition states

## Contents

\*Corresponding author. Fax: +86-10-6739-2001. E-mail: [ydliu@bjut.edu.cn](mailto:ydliu@bjut.edu.cn).

| <b>Item</b>                      | <b>Page</b> |
|----------------------------------|-------------|
| Text SI-1                        | 7           |
| Table SI-1                       | 8           |
| Table SI-2                       | 9           |
| Table SI-3                       | 10          |
| Table SI-4                       | 11          |
| Figure SI-1                      | 12          |
| Figure SI-2                      | 13          |
| Figure SI-3                      | 14          |
| Standard orientation of Ts-T-a   | 15          |
| Standard orientation of Ts-T-b'  | 16          |
| Standard orientation of Ts-T-c   | 17          |
| Standard orientation of Ts-T-d   | 18          |
| Standard orientation of Ts-T-e   | 19          |
| Standard orientation of Ts-T-f   | 20          |
| Standard orientation of Ts-TE-a  | 21          |
| Standard orientation of Ts-TE-b' | 22          |
| Standard orientation of Ts-TE-c  | 23          |
| Standard orientation of Ts-TE-d  | 24          |
| Standard orientation of Ts-TE-e  | 25          |
| Standard orientation of Ts-TE-f  | 26          |

|                                  |    |
|----------------------------------|----|
| Standard orientation of Ts-D-a   | 27 |
| Standard orientation of Ts-D-b'  | 28 |
| Standard orientation of Ts-D-c   | 29 |
| Standard orientation of Ts-D-d   | 30 |
| Standard orientation of Ts-D-d'  | 31 |
| Standard orientation of Ts-D-e   | 32 |
| Standard orientation of Ts-D-f   | 33 |
| Standard orientation of Ts-D-g   | 34 |
| Standard orientation of Ts-D-h   | 35 |
| Standard orientation of Ts-D-i   | 36 |
| Standard orientation of Ts-D-j   | 37 |
| Standard orientation of Ts-D-j'  | 38 |
| Standard orientation of Ts-D-j'' | 39 |
| Standard orientation of Ts-D-k   | 40 |
| Standard orientation of Ts-D-l   | 41 |
| Standard orientation of Ts-D-m   | 42 |
| Standard orientation of Ts-D-n   | 43 |
| Standard orientation of Ts-D-n'  | 44 |
| Standard orientation of Ts-D-n'' | 45 |
| Standard orientation of Ts-D-o   | 46 |
| Standard orientation of Ts-D-p   | 47 |

|                                  |    |
|----------------------------------|----|
| Standard orientation of Ts-D-p'  | 48 |
| Standard orientation of Ts-DE-a  | 49 |
| Standard orientation of Ts-DE-b' | 50 |
| Standard orientation of Ts-DE-c  | 51 |
| Standard orientation of Ts-DE-d  | 52 |
| Standard orientation of Ts-DE-d' | 53 |
| Standard orientation of Ts-DE-e  | 54 |
| Standard orientation of Ts-DE-f  | 55 |
| Standard orientation of Ts-DE-g  | 56 |
| Standard orientation of Ts-DE-h  | 57 |
| Standard orientation of Ts-DE-l  | 58 |
| Standard orientation of Ts-DE-m  | 59 |
| Standard orientation of Ts-M-a   | 60 |
| Standard orientation of Ts-M-b'  | 61 |
| Standard orientation of Ts-M-c   | 62 |
| Standard orientation of Ts-M-d   | 63 |
| Standard orientation of Ts-M-e   | 64 |
| Standard orientation of Ts-M-e'  | 65 |
| Standard orientation of Ts-M-f   | 66 |
| Standard orientation of Ts-M-g   | 67 |
| Standard orientation of Ts-M-g'  | 68 |

|                                  |    |
|----------------------------------|----|
| Standard orientation of Ts-M-h   | 69 |
| Standard orientation of Ts-M-i   | 70 |
| Standard orientation of Ts-M-j   | 71 |
| Standard orientation of Ts-M-k   | 72 |
| Standard orientation of Ts-M-l   | 73 |
| Standard orientation of Ts-M-l'  | 74 |
| Standard orientation of Ts-M-l'' | 75 |
| Standard orientation of Ts-M-m   | 76 |
| Standard orientation of Ts-M-n   | 77 |
| Standard orientation of Ts-M-n'  | 78 |
| Standard orientation of Ts-M-n'' | 79 |
| Standard orientation of Ts-M-o   | 80 |
| Standard orientation of Ts-M-p   | 81 |
| Standard orientation of Ts-M-p'  | 82 |
| Standard orientation of Ts-M-q   | 83 |
| Standard orientation of Ts-E-a   | 84 |
| Standard orientation of Ts-E-b'  | 85 |
| Standard orientation of Ts-E-c   | 86 |
| Standard orientation of Ts-E-d   | 87 |
| Standard orientation of Ts-E-e   | 88 |
| Standard orientation of Ts-E-e'  | 89 |

|                                 |    |
|---------------------------------|----|
| Standard orientation of Ts-E-f  | 90 |
| Standard orientation of Ts-E-g  | 91 |
| Standard orientation of Ts-E-g' | 92 |
| Standard orientation of Ts-E-h  | 93 |
| Standard orientation of Ts-E-j  | 94 |
| Standard orientation of Ts-E-k  | 95 |

**Text SI-1**

## Calculation details of validation of calculation method on the decomposition of the simple amines during ozonation

Regarding there is less information on the ozone-reactivity of nitrogenous compounds, computed thermokinetic methods have been developed based on the current kinetic/mechanistic knowledge to predict the reactivities of molecules toward ozone in cases where no experimental data were available. Therefore, the first and most important thing is to obtain a relatively accurate calculation method. To obtain a suitable method for this research work, the basis set 6-311++G (d, p), three DFT methods M05, LC- $\omega$ PBE and WB97XD along with implicit CPCM and SMD solvent models have been tested for TMA/TEA and DEA/DMA with ozone, and the calculated results are listed in Table SI-1.

Previous studies have been reported that the experimental rate constants  $k$  of TEA/TMA and DEA/DMA with ozone are in the range of  $10^5\sim 10^7\text{ M}^{-1}\text{ s}^{-1}$ . As shown in Table SI-1 that the activation free energies ( $\Delta G^\ddagger$ ) calculated with LC- $\omega$ PBE functional method along with CPCM solvent model are 8~10 kcal/mol whereas those with SMD model are 4~13 kcal/mol, and the estimated  $\Delta G^\ddagger$  based on the experimental rate constant are also around 8~10 kcal/mol. It is clear that the results calculated with CPCM model are significantly better than those from SMD model. However, the results calculated with WB97XD and M05 functional method, no matter which solvent model, are both not well suitable for the reactions, considering the experimental rate constants. As discussed above, it can be concluded that the activation free energies obtained with

LC- $\omega$ PBE along with 6-311++G (d, p) basis set and the CPCM solvent model are in great agreement with the experimental results.

Table SI-1. Activation free energies (at 298 K and 1 atm, in kcal/mol) calculated with different methods for reactions of TMA and DMA with ozone. (basis set is 6-311++G\*\*)

| parents            | M05  |      | LC- $\omega$ PBE |      | WB97XD |     |
|--------------------|------|------|------------------|------|--------|-----|
|                    | cpcm | smd  | cpcm             | smd  | cpcm   | smd |
| TMA+O <sub>3</sub> | 13.9 | 9.0  | 8.4              | 10.4 | 8.0    | 5.7 |
| DMA+O <sub>3</sub> | 13.7 | 8.4  | 8.9              | 4.7  | 8.8    | 4.4 |
| TEA+O <sub>3</sub> | 14.3 | 11.9 | 9.6              | 12.8 | 9.3    | 9.5 |
| DEA+O <sub>3</sub> | 13.0 | 7.4  | 9.4              | 5.9  | 8.2    | 4.8 |



Table SI-2 Activation Free Energies and Reaction Energies (at 298 K and 1 atm, in kcal/mol) Calculated at the LC- $\omega$ PBE(CPCM)/6-311++G(d,p) Level for Elementary Steps of TMA/TEA Degradation Pathways during Ozonation.

| Reaction step | $\Delta G^\ddagger(\text{TMA/TEA})$ | $\Delta H(\text{TMA/TEA})$ | $\Delta G(\text{TMA/TEA})$ |
|---------------|-------------------------------------|----------------------------|----------------------------|
| T-a           | 8.4/9.6                             | -9.0/-8.8                  | -9.2/-9.8                  |
| T-a'          |                                     | 15.4/14.9                  | 3.2/3.6                    |
| T-b           | --                                  | -38.3/-38.2                | -46.1/-45.6                |
| T-b'          | 34.4/39.5                           | -10.3/-17.5                | -10.6/-18.2                |
| T-c           | 5.6/5.1                             | -64.6/-61.0                | -72.2/-69.6                |
| T-d           | 18.5/24.3                           | -7.5/-16.7                 | -7.5/-17.4                 |
| T-e           | 25.1/33.8                           | -8.7/-0.6                  | 3.2/11.5                   |
| T-f           | 9.2/8.3                             | 16.1/7.8                   | 3.8/-5.0                   |

Table SI-3 Activation Free Energies and Reaction Energies (at 298 K and 1 atm, in kcal/mol) Calculated at the LC- $\omega$ PBE (CPCM)/6-311++G(d,p) Level for Elementary Steps of DMA and Some Key Steps of DEA Degradation Pathways during Ozonation (D-k was calculated at 6-311+G(d)).

| Reaction step | $\Delta G^\ddagger$ (DMA/DEA) | $\Delta H$ (DMA/DEA) | $\Delta G$ (DMA/DEA) |
|---------------|-------------------------------|----------------------|----------------------|
| D-a           | 8.9/9.3                       | -9.3/-17.9           | -9.7/-16.0           |
| D-b           | --/--                         | -38.6/-29.8          | -46.2/-40.2          |
| D-b'          | 34.1/36.9                     | -12.1/-18.9          | -11.0/-17.6          |
| D-c           | 5.4/5.2                       | -8.5/-7.7            | -9.7/-7.9            |
| D-d           | 8.4/11.0                      | -48.6/-49.5          | -47.6/-48.2          |
| D-d'          | 12.6/10.6                     | -29.6/-36.4          | -30.0/-37.4          |
| D-e           | 18.9/16.5                     | -24.6/-30.4          | -35.5/-42.3          |
| D-f           | 8.4/12.8                      | -10.4/-12.5          | 2.4/1.7              |
| D-g           | 5.4/7.4                       | -44.0/-46.8          | -69.5/-72.7          |
| D-h           | 8.9/9.3                       | -77.6/-78.0          | -75.6/-77.1          |
| D-i           | 5.4                           | -66.6                | -74.7                |
| D-j           | 10.5                          | 13.4                 | 2.0                  |
| D-j'          | 15.6                          | -37.4                | -35.2                |
| D-j''         | 23.6                          | 8.3                  | -2.1                 |
| D-k           | 3.7                           | -0.6                 | -13.7                |
| D-l           | 14.6/12.4                     | -11.9/-20.7          | -11.2/-21.3          |
| D-m           | 21.4/27.3                     | -10.9/-4.5           | 0.1/7.3              |
| D-n           | 6.9                           | -2.3                 | 8.0                  |
| D-n'          | 18.7                          | -27.8                | -15.2                |
| D-n''         | 23.2                          | -50.9                | -49.8                |
| D-o           | 5.5                           | -104.9               | -114.0               |
| D-p           | 56.5                          | -81.6                | -92.9                |
| D-p'          | 10.8                          | -23.1                | -34.6                |

Table SI-4 Activation Free Energies and Reaction Energies (at 298 K and 1 atm, in kcal/mol) Calculated at the LC- $\omega$ PBE (CPCM)/6-311++G(d,p) Level for Elementary Steps of MA and Some Key Steps of EA Degradation Pathways during Ozonation (M-m was calculated at 6-311+G(d)).

| Reaction step | $\Delta G^\ddagger$ (MA/EA) | $\Delta H$ (MA/EA) | $\Delta G$ (MA/EA) |
|---------------|-----------------------------|--------------------|--------------------|
| M-a           | 10.4/10.1                   | -8.4/-8.7          | -7.8/-8.2          |
| M-b           | --                          | -37.7/-37.1        | -45.5/-45.4        |
| M-b'          | 35.3/38.0                   | -26.9/-32.0        | -36.5/-42.0        |
| M-c           | 5.7/6.0                     | -9.8/-9.5          | -10.2/-9.9         |
| M-d           | 10.4/10.1                   | -46.3/-46.9        | -45.4/-45.9        |
| M-e           | 11.6/10.2                   | -20.8/-20.2        | -32.1/-31.9        |
| M-e'          | 9.5/9.3                     | -9.3/-8.1          | -9.2/-8.0          |
| M-f           | 8.9/9.3                     | -77.6/-78.0        | -75.6/-77.1        |
| M-g           | 11.1/9.8                    | -47.1/-48.8        | -45.9/-47.9        |
| M-g'          | 24.1/24.1                   | -11.5/-12.1        | -23.0/-23.9        |
| M-h           | 8.6/8.6                     | -42.0/-41.2        | -52.6/-53.1        |
| M-i           | 24.1                        | -13.1              | -2.7               |
| M-j           | 4.4/5.4                     | -17.1/-27.1        | -18.0/-27.7        |
| M-k           | 21.6/29.3                   | -14.4/-7.9         | -3.8/3.5           |
| M-l           | 12.1                        | 11.6               | 0.5                |
| M-l'          | 18.0                        | -34.1              | -32.6              |
| M-l''         | 28.0                        | 13.1               | 2.7                |
| M-m           | 4.4                         | -2.2               | -14.7              |
| M-n           | 9.9                         | -13.0              | -7.9               |
| M-n'          | 19.2                        | -24.8              | -12.4              |
| M-o           | 2.6                         | -112.0             | -121.9             |
| M-p           | 52.7                        | -87.7              | -99.6              |
| M-p'          | 12.2                        | -22.9              | -34.5              |
| M-q           | 9.8                         | -7.2               | -7.5               |

Figure SI-1

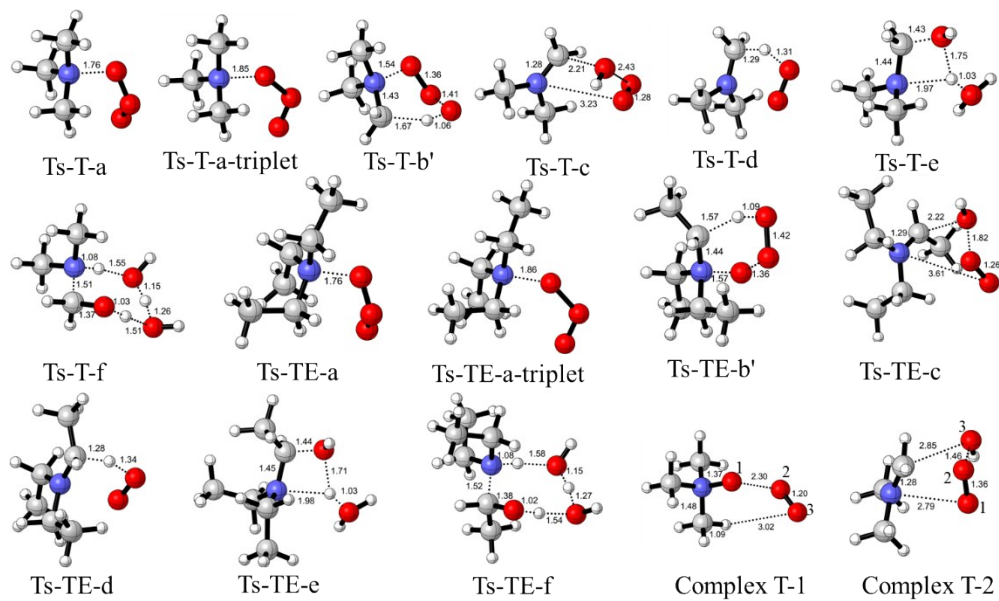

Fig. SI-1 Structures of transition states and important geometric parameters calculated at the LC- $\omega$ PBE/6-311++G(d,p) levels involved in each elementary step of TMA/TEA degradation pathways during Ozonation (atoms in blue color represent nitrogen atom; atoms in red represent oxygen atom, atoms in white represent hydrogen atom; atoms in grey color represent carbon atom).

Figure SI-2

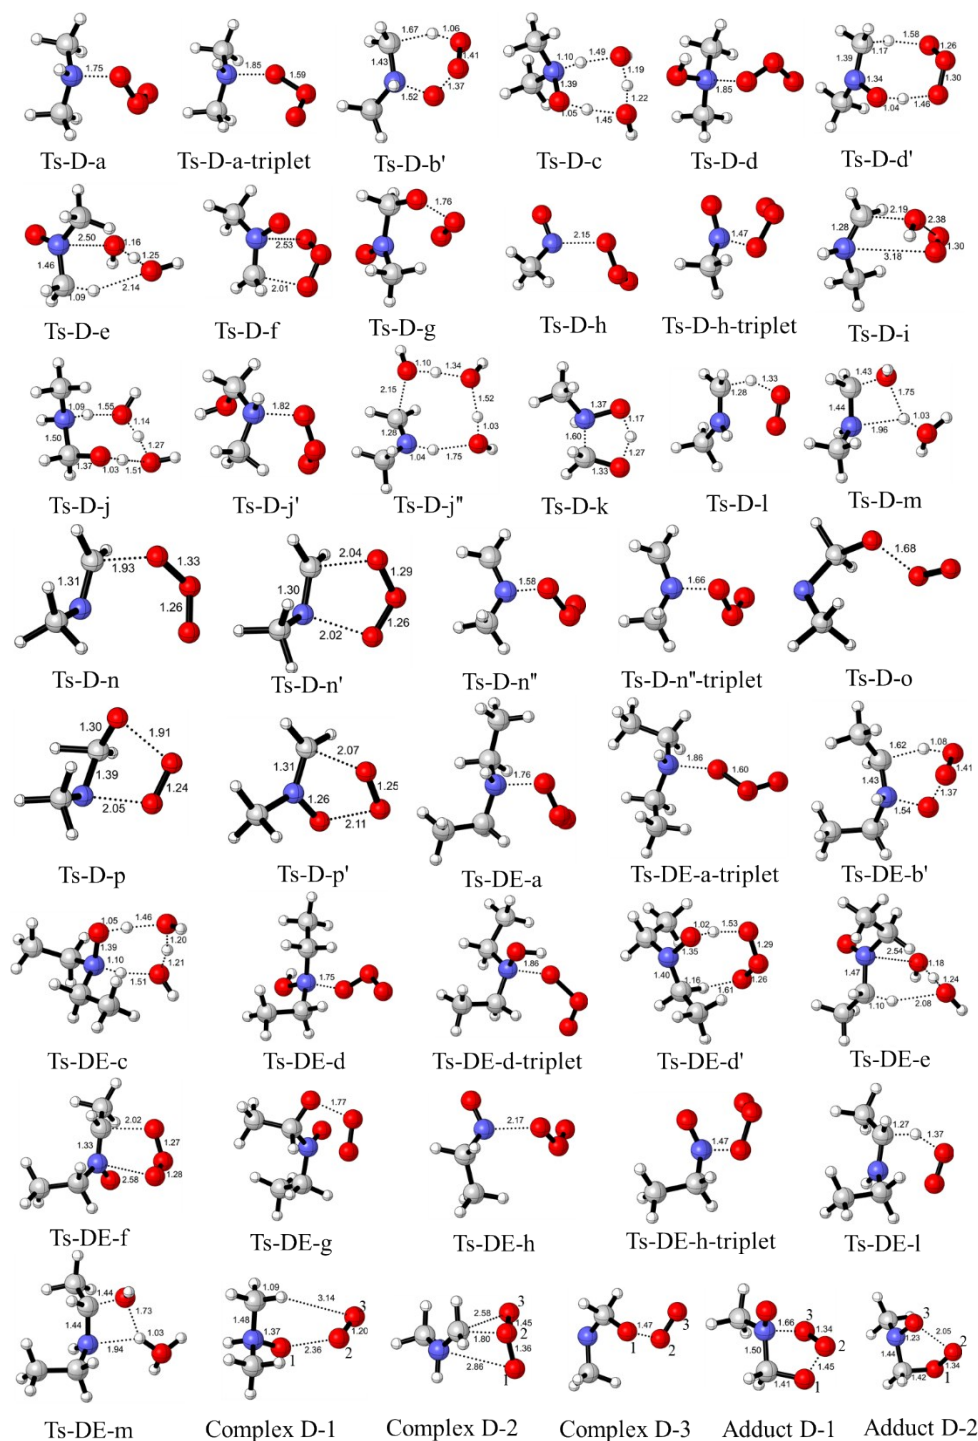

Fig. SI-2 Structures of transition states and important geometric parameters calculated at the LC- $\omega$ PBE/6-311++G(d,p) levels involved in each elementary step of DMA and some key steps of DEA degradation pathways during Ozonation (Ts-D-k was calculated at 6-311+G(d), atoms in blue color represent nitrogen atom; atoms in red represent oxygen atom, atoms in white represent hydrogen atom; atoms in grey color represent carbon atom).

**Figure SI-3**

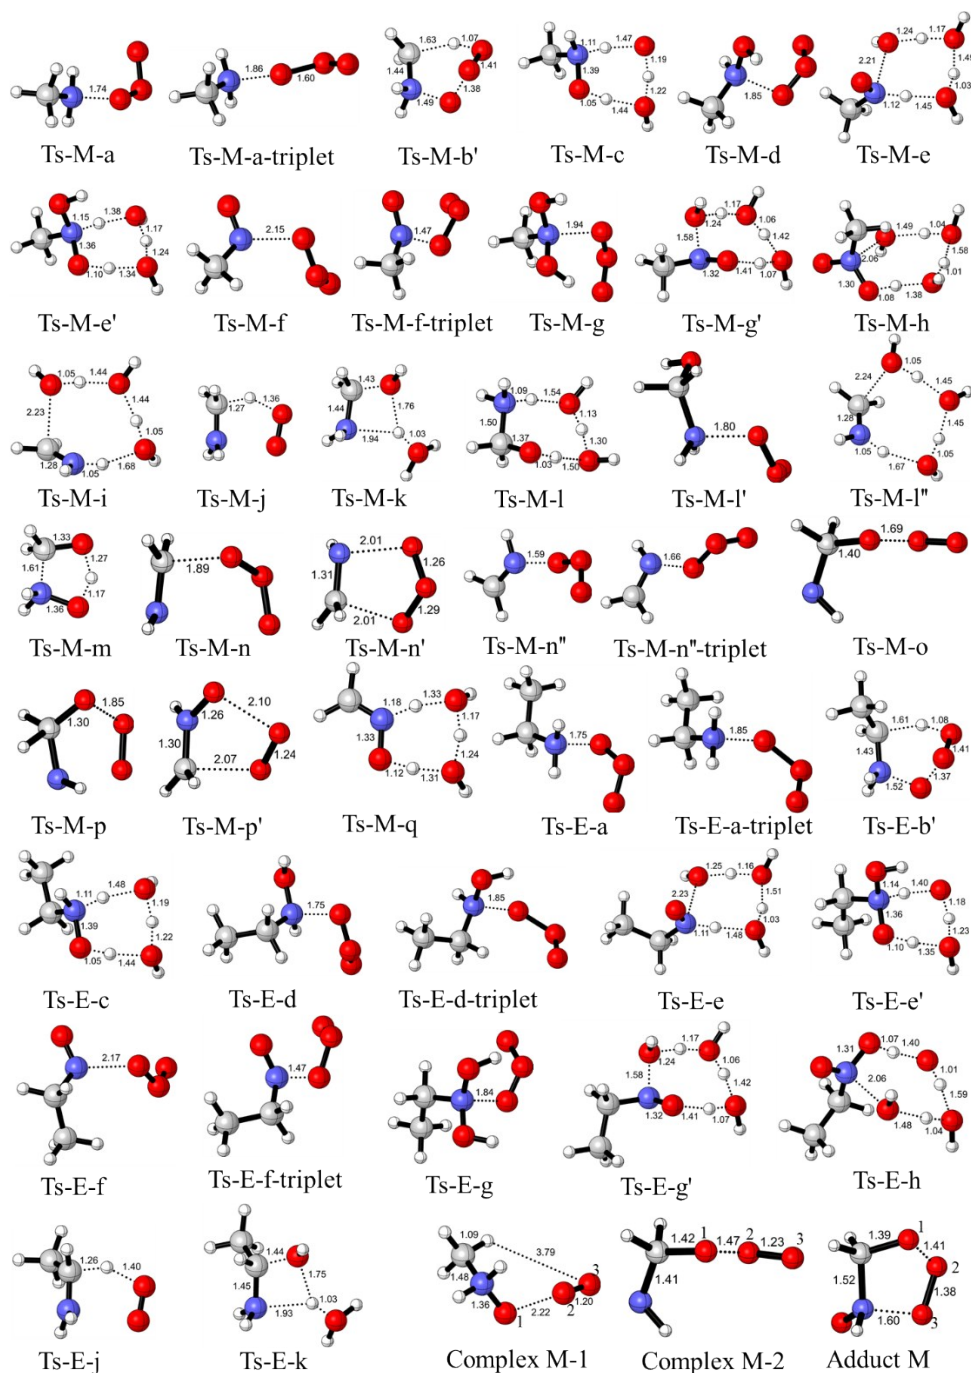

Fig. SI-3 Structures of transition states and important geometric parameters calculated at the LC- $\omega$ PBE/6-311++G(d,p) levels involved in each elementary step of MA and some key steps of EA degradation pathways during Ozonation (Ts-M-m was calculated at 6-311+G(d), atoms in blue color represent nitrogen atom; atoms in red represent oxygen atom, atoms in white represent hydrogen atom; atoms in grey color represent carbon atom).

## Standard orientation of Ts-T-a

Cartesian coordinates of all the transition states optimized at the LC- $\omega$ PBE/6-311++G(d,p) level:

Standard orientation of transition state of Ts-T-a

State=1-A

Charge = 0    Multiplicity = 1

Lowest Harmonic Vibrational Frequency (LHVF) = -935.64 cm<sup>-1</sup>

Standard orientation:

| Center<br>Number | Atomic<br>Number | Atomic<br>Type | Coordinates (Angstroms) |           |           |
|------------------|------------------|----------------|-------------------------|-----------|-----------|
|                  |                  |                | X                       | Y         | Z         |
| 1                | 7                | 0              | 0.802344                | 0.074208  | 0.055072  |
| 2                | 6                | 0              | 0.816659                | 1.455841  | -0.419656 |
| 3                | 1                | 0              | 0.771896                | 1.450413  | -1.507051 |
| 4                | 1                | 0              | 1.741991                | 1.936737  | -0.092874 |
| 5                | 8                | 0              | -1.622711               | -0.658687 | 0.032807  |
| 6                | 8                | 0              | -0.578437               | -0.689106 | -0.724918 |
| 7                | 8                | 0              | -2.290010               | 0.520709  | -0.041693 |
| 8                | 6                | 0              | 0.590747                | -0.077228 | 1.484368  |
| 9                | 1                | 0              | -0.307458               | 0.465117  | 1.771177  |
| 10               | 1                | 0              | 0.477295                | -1.134167 | 1.718720  |
| 11               | 6                | 0              | 1.887121                | -0.734263 | -0.486507 |
| 12               | 1                | 0              | 2.844517                | -0.312753 | -0.173879 |
| 13               | 1                | 0              | 1.791317                | -1.754436 | -0.122207 |
| 14               | 1                | 0              | 1.822943                | -0.722024 | -1.573648 |
| 15               | 1                | 0              | -0.050450               | 1.974658  | -0.021664 |
| 16               | 1                | 0              | 1.453642                | 0.327584  | 2.017115  |

## Standard orientation of Ts-T-b'

Cartesian coordinates of all the transition states optimized at the LC- $\omega$ PBE/6-311++G(d,p) level:

Standard orientation of transition state of Ts-T-b'

State=1-A

Charge = 0    Multiplicity = 1

Lowest Harmonic Vibrational Frequency (LHVF) = -529.65 cm<sup>-1</sup>

Standard orientation:

| Center<br>Number | Atomic<br>Number | Atomic<br>Type | Coordinates (Angstroms) |           |           |
|------------------|------------------|----------------|-------------------------|-----------|-----------|
|                  |                  |                | X                       | Y         | Z         |
| 1                | 7                | 0              | 0.707354                | -0.090845 | 0.084879  |
| 2                | 8                | 0              | -1.460060               | 0.737979  | -0.134509 |
| 3                | 8                | 0              | -0.362515               | 0.446681  | -0.891114 |
| 4                | 8                | 0              | -2.207898               | -0.453722 | -0.006193 |
| 5                | 6                | 0              | 1.637420                | -0.688331 | -0.891282 |
| 6                | 1                | 0              | 1.162674                | -1.569363 | -1.315203 |
| 7                | 6                | 0              | 0.135644                | -1.004735 | 1.028858  |
| 8                | 1                | 0              | -1.467611               | -0.935596 | 0.571975  |
| 9                | 6                | 0              | 1.262082                | 1.133415  | 0.697072  |
| 10               | 1                | 0              | 2.115628                | 0.844381  | 1.306409  |
| 11               | 1                | 0              | 0.313993                | -0.656295 | 2.041399  |
| 12               | 1                | 0              | 1.561180                | 1.822846  | -0.089011 |
| 13               | 1                | 0              | 2.543656                | -0.963410 | -0.356509 |
| 14               | 1                | 0              | 1.859152                | 0.039175  | -1.669950 |
| 15               | 1                | 0              | 0.505354                | -2.009641 | 0.843431  |
| 16               | 1                | 0              | 0.487403                | 1.574214  | 1.319957  |



## Standard orientation of Ts-T-c

Cartesian coordinates of all the transition states optimized at the LC- $\omega$ PBE/6-311++G(d,p) level:

Standard orientation of transition state of Ts-T-c

State=1-A

Charge = 0    Multiplicity = 1

Lowest Harmonic Vibrational Frequency (LHVF) = -529.65 cm<sup>-1</sup>

Standard orientation:

| Center<br>Number | Atomic<br>Number | Atomic<br>Type | Coordinates (Angstroms) |           |           |
|------------------|------------------|----------------|-------------------------|-----------|-----------|
|                  |                  |                | X                       | Y         | Z         |
| 1                | 7                | 0              | 0.707354                | -0.090845 | 0.084879  |
| 2                | 8                | 0              | -1.460060               | 0.737979  | -0.134509 |
| 3                | 8                | 0              | -0.362515               | 0.446681  | -0.891114 |
| 4                | 8                | 0              | -2.207898               | -0.453722 | -0.006193 |
| 5                | 6                | 0              | 1.637420                | -0.688331 | -0.891282 |
| 6                | 1                | 0              | 1.162674                | -1.569363 | -1.315203 |
| 7                | 6                | 0              | 0.135644                | -1.004735 | 1.028858  |
| 8                | 1                | 0              | -1.467611               | -0.935596 | 0.571975  |
| 9                | 6                | 0              | 1.262082                | 1.133415  | 0.697072  |
| 10               | 1                | 0              | 2.115628                | 0.844381  | 1.306409  |
| 11               | 1                | 0              | 0.313993                | -0.656295 | 2.041399  |
| 12               | 1                | 0              | 1.561180                | 1.822846  | -0.089011 |
| 13               | 1                | 0              | 2.543656                | -0.963410 | -0.356509 |
| 14               | 1                | 0              | 1.859152                | 0.039175  | -1.669950 |
| 15               | 1                | 0              | 0.505354                | -2.009641 | 0.843431  |
| 16               | 1                | 0              | 0.487403                | 1.574214  | 1.319957  |

## Standard orientation of Ts-T-d

Cartesian coordinates of all the transition states optimized at the LC- $\omega$ PBE/6-311++G(d,p) level:

Standard orientation of transition state of Ts-T-d

State=1-A

Charge = 1    Multiplicity = 2

Lowest Harmonic Vibrational Frequency (LHVF) = -2055.63 cm<sup>-1</sup>

Standard orientation:

| Center<br>Number | Atomic<br>Number | Atomic<br>Type | Coordinates (Angstroms) |           |           |
|------------------|------------------|----------------|-------------------------|-----------|-----------|
|                  |                  |                | X                       | Y         | Z         |
| 1                | 7                | 0              | 0.689552                | 0.000001  | 0.189850  |
| 2                | 6                | 0              | 1.177008                | 1.240515  | -0.401418 |
| 3                | 1                | 0              | 2.231407                | 1.349082  | -0.139240 |
| 4                | 1                | 0              | 1.075368                | 1.187470  | -1.482888 |
| 5                | 1                | 0              | 0.613425                | 2.083310  | -0.008552 |
| 6                | 8                | 0              | -1.322048               | -0.000012 | -0.909249 |
| 7                | 8                | 0              | -2.006019               | -0.000002 | 0.084480  |
| 8                | 6                | 0              | 1.177017                | -1.240520 | -0.401392 |
| 9                | 1                | 0              | 0.613534                | -2.083324 | -0.008405 |
| 10               | 1                | 0              | 1.075248                | -1.187553 | -1.482854 |
| 11               | 1                | 0              | 2.231455                | -1.349001 | -0.139332 |
| 12               | 6                | 0              | 0.109566                | 0.000015  | 1.395817  |
| 13               | 1                | 0              | 0.156631                | 0.932624  | 1.951876  |
| 14               | 1                | 0              | -1.137579               | 0.000007  | 1.068652  |
| 15               | 1                | 0              | 0.156637                | -0.932578 | 1.951902  |

## Standard orientation of Ts-T-e

Cartesian coordinates of all the transition states optimized at the LC- $\omega$ PBE/6-311++G(d,p) level:

Standard orientation of transition state of Ts-T-e

State=1-A

Charge = 1    Multiplicity = 1

Lowest Harmonic Vibrational Frequency (LHVF) = -579.13 cm<sup>-1</sup>

Standard orientation:

---

| Center<br>Number | Atomic<br>Number | Atomic<br>Type | Coordinates (Angstroms) |           |           |
|------------------|------------------|----------------|-------------------------|-----------|-----------|
|                  |                  |                | X                       | Y         | Z         |
| 1                | 7                | 0              | 0.631705                | 0.128754  | -0.018150 |
| 2                | 6                | 0              | 0.242926                | -1.209399 | -0.382048 |
| 3                | 1                | 0              | 0.797451                | -1.985513 | 0.156430  |
| 4                | 1                | 0              | 0.380028                | -1.345907 | -1.454293 |
| 5                | 8                | 0              | -1.152406               | -1.333402 | -0.110168 |
| 6                | 1                | 0              | -1.305045               | -1.874016 | 0.670452  |
| 7                | 6                | 0              | 1.032262                | 0.238489  | 1.379590  |
| 8                | 1                | 0              | 1.982354                | -0.277023 | 1.572260  |
| 9                | 1                | 0              | 1.144721                | 1.289832  | 1.646777  |
| 10               | 1                | 0              | 0.264915                | -0.191594 | 2.025500  |
| 11               | 6                | 0              | 1.615929                | 0.720739  | -0.913746 |
| 12               | 1                | 0              | 1.760124                | 1.768044  | -0.645834 |
| 13               | 1                | 0              | 2.588533                | 0.214804  | -0.856444 |
| 14               | 1                | 0              | 1.256033                | 0.677317  | -1.942305 |
| 15               | 1                | 0              | -2.810175               | 0.997703  | -0.418688 |
| 16               | 8                | 0              | -1.966392               | 1.201197  | 0.019454  |
| 17               | 1                | 0              | -1.553507               | 1.982047  | -0.386077 |
| 18               | 1                | 0              | -1.323687               | 0.401701  | -0.017794 |

---

## Standard orientation of Ts-T-f

Cartesian coordinates of all the transition states optimized at the LC- $\omega$ PBE/6-311++G(d,p) level:

Standard orientation of transition state of Ts-T-f

State=1-A

Charge = 0    Multiplicity = 1

Lowest Harmonic Vibrational Frequency (LHVF) = -550.33 cm<sup>-1</sup>

Standard orientation:

| Center<br>Number | Atomic<br>Number | Atomic<br>Type | Coordinates (Angstroms) |           |           |
|------------------|------------------|----------------|-------------------------|-----------|-----------|
|                  |                  |                | X                       | Y         | Z         |
| 1                | 7                | 0              | -0.966106               | 0.125392  | -0.004108 |
| 2                | 6                | 0              | -0.340774               | -1.092219 | -0.632472 |
| 3                | 1                | 0              | 1.495492                | -1.076146 | 0.038878  |
| 4                | 1                | 0              | -1.146834               | -1.815743 | -0.780789 |
| 5                | 8                | 0              | 0.635544                | -1.623170 | 0.162516  |
| 6                | 8                | 0              | 2.612247                | -0.084474 | -0.214429 |
| 7                | 1                | 0              | 1.904851                | 0.937822  | 0.012072  |
| 8                | 1                | 0              | 3.336786                | -0.149793 | 0.410645  |
| 9                | 8                | 0              | 1.095083                | 1.748426  | 0.138292  |
| 10               | 1                | 0              | -0.163634               | 0.841509  | 0.123698  |
| 11               | 1                | 0              | 1.250095                | 2.230647  | 0.953412  |
| 12               | 6                | 0              | -1.538717               | -0.179310 | 1.318329  |
| 13               | 1                | 0              | -0.767480               | -0.630228 | 1.937324  |
| 14               | 1                | 0              | -1.888824               | 0.745321  | 1.773783  |
| 15               | 6                | 0              | -1.961973               | 0.724635  | -0.908988 |
| 16               | 1                | 0              | -1.482298               | 0.978174  | -1.852858 |
| 17               | 1                | 0              | -2.772680               | 0.017396  | -1.085011 |
| 18               | 1                | 0              | -2.358960               | 1.628340  | -0.450814 |
| 19               | 1                | 0              | 0.034583                | -0.757614 | -1.605445 |
| 20               | 1                | 0              | -2.372572               | -0.872321 | 1.201612  |

## Standard orientation of Ts-TE-a

Cartesian coordinates of all the transition states optimized at the LC- $\omega$ PBE /6-311++G(d,p) level:

Standard orientation of transition state of Ts-TE-a

State=1-A

Charge = 0 Multiplicity = 1

Lowest Harmonic Vibrational Frequency (LHVF) = -926.47 cm<sup>-1</sup>

Standard orientation:

| Center<br>Number | Atomic<br>Number | Atomic<br>Type | Coordinates (Angstroms) |           |           |
|------------------|------------------|----------------|-------------------------|-----------|-----------|
|                  |                  |                | X                       | Y         | Z         |
| 1                | 7                | 0              | -0.455832               | 0.039356  | -0.040797 |
| 2                | 6                | 0              | -0.431933               | 0.377983  | 1.391653  |
| 3                | 1                | 0              | -0.483107               | -0.571893 | 1.923339  |
| 4                | 1                | 0              | -1.356527               | 0.923948  | 1.606150  |
| 5                | 8                | 0              | 1.731074                | -1.001401 | -0.894611 |
| 6                | 8                | 0              | 0.659879                | -1.311795 | -0.235287 |
| 7                | 8                | 0              | 2.734823                | -0.553372 | -0.096628 |
| 8                | 6                | 0              | 0.024661                | 1.067373  | -0.968502 |
| 9                | 1                | 0              | 1.039937                | 1.319535  | -0.667733 |
| 10               | 1                | 0              | 0.083149                | 0.595813  | -1.950428 |
| 11               | 6                | 0              | -1.719060               | -0.584926 | -0.480041 |
| 12               | 1                | 0              | -2.485270               | 0.194391  | -0.470824 |
| 13               | 1                | 0              | -1.560081               | -0.888849 | -1.514866 |
| 14               | 6                | 0              | -0.855972               | 2.304157  | -1.015352 |
| 15               | 1                | 0              | -0.380914               | 3.035623  | -1.669625 |
| 16               | 1                | 0              | -1.845092               | 2.091190  | -1.420399 |
| 17               | 1                | 0              | -0.970607               | 2.761972  | -0.031821 |
| 18               | 6                | 0              | -2.167633               | -1.764034 | 0.358564  |
| 19               | 1                | 0              | -2.473570               | -1.468254 | 1.361975  |
| 20               | 1                | 0              | -3.035260               | -2.209939 | -0.128972 |
| 21               | 1                | 0              | -1.393613               | -2.527184 | 0.430695  |
| 22               | 6                | 0              | 0.782360                | 1.158429  | 1.836607  |
| 23               | 1                | 0              | 0.778263                | 2.183272  | 1.463256  |
| 24               | 1                | 0              | 0.777478                | 1.204286  | 2.926280  |
| 25               | 1                | 0              | 1.695299                | 0.659256  | 1.503184  |

## Standard orientation of Ts-TE-b'

Cartesian coordinates of all the transition states optimized at the LC- $\omega$ PBE /6-311++G(d,p) level:

Standard orientation of transition state of Ts-TE-b'

State=1-A

Charge = 0 Multiplicity = 1

Lowest Harmonic Vibrational Frequency (LHVF) = -912.87 cm<sup>-1</sup>

Standard orientation:

| Center<br>Number | Atomic<br>Number | Atomic<br>Type | Coordinates (Angstroms) |           |           |
|------------------|------------------|----------------|-------------------------|-----------|-----------|
|                  |                  |                | X                       | Y         | Z         |
| 1                | 7                | 0              | 0.338364                | -0.040598 | 0.226237  |
| 2                | 8                | 0              | -1.447930               | 0.733704  | -1.116436 |
| 3                | 8                | 0              | -0.148541               | 0.334294  | -1.220290 |
| 4                | 8                | 0              | -2.248631               | -0.433672 | -1.083690 |
| 5                | 6                | 0              | 1.500939                | -0.908588 | -0.134749 |
| 6                | 1                | 0              | 1.071840                | -1.764422 | -0.649982 |
| 7                | 6                | 0              | -0.705763               | -0.690916 | 0.965245  |
| 8                | 1                | 0              | -1.865670               | -0.686014 | -0.097082 |
| 9                | 6                | 0              | 0.803005                | 1.253929  | 0.812497  |
| 10               | 1                | 0              | 1.357610                | 0.967557  | 1.708352  |
| 11               | 6                | 0              | -0.266189               | 2.272390  | 1.138966  |
| 12               | 1                | 0              | -0.783138               | 2.615854  | 0.245486  |
| 13               | 1                | 0              | -1.001552               | 1.910481  | 1.855458  |
| 14               | 1                | 0              | 0.240167                | 3.128748  | 1.587921  |
| 15               | 6                | 0              | -0.576768               | -2.178713 | 1.213516  |
| 16               | 1                | 0              | -1.425115               | -2.467963 | 1.837380  |
| 17               | 1                | 0              | -0.652444               | -2.778730 | 0.301617  |
| 18               | 1                | 0              | 0.328689                | -2.493306 | 1.746288  |
| 19               | 6                | 0              | 2.580998                | -0.269138 | -0.982507 |
| 20               | 1                | 0              | 2.179483                | 0.185004  | -1.887298 |
| 21               | 1                | 0              | 3.165681                | 0.470664  | -0.436811 |
| 22               | 1                | 0              | 3.265383                | -1.063568 | -1.283680 |
| 23               | 1                | 0              | -0.912041               | -0.118089 | 1.862147  |
| 24               | 1                | 0              | 1.499216                | 1.682327  | 0.095392  |
| 25               | 1                | 0              | 1.906817                | -1.252746 | 0.816672  |

## Standard orientation of Ts-TE-c

Cartesian coordinates of all the transition states optimized at the LC- $\omega$ PBE /6-311++G(d,p) level:

Standard orientation of transition state of Ts-TE-c

State=1-A

Charge = 0 Multiplicity = 1

Lowest Harmonic Vibrational Frequency (LHVF) = -912.87 cm<sup>-1</sup>

Standard orientation:

| Center<br>Number | Atomic<br>Number | Atomic<br>Type | Coordinates (Angstroms) |           |           |
|------------------|------------------|----------------|-------------------------|-----------|-----------|
|                  |                  |                | X                       | Y         | Z         |
| 1                | 7                | 0              | 0.338364                | -0.040598 | 0.226237  |
| 2                | 8                | 0              | -1.447930               | 0.733704  | -1.116436 |
| 3                | 8                | 0              | -0.148541               | 0.334294  | -1.220290 |
| 4                | 8                | 0              | -2.248631               | -0.433672 | -1.083690 |
| 5                | 6                | 0              | 1.500939                | -0.908588 | -0.134749 |
| 6                | 1                | 0              | 1.071840                | -1.764422 | -0.649982 |
| 7                | 6                | 0              | -0.705763               | -0.690916 | 0.965245  |
| 8                | 1                | 0              | -1.865670               | -0.686014 | -0.097082 |
| 9                | 6                | 0              | 0.803005                | 1.253929  | 0.812497  |
| 10               | 1                | 0              | 1.357610                | 0.967557  | 1.708352  |
| 11               | 6                | 0              | -0.266189               | 2.272390  | 1.138966  |
| 12               | 1                | 0              | -0.783138               | 2.615854  | 0.245486  |
| 13               | 1                | 0              | -1.001552               | 1.910481  | 1.855458  |
| 14               | 1                | 0              | 0.240167                | 3.128748  | 1.587921  |
| 15               | 6                | 0              | -0.576768               | -2.178713 | 1.213516  |
| 16               | 1                | 0              | -1.425115               | -2.467963 | 1.837380  |
| 17               | 1                | 0              | -0.652444               | -2.778730 | 0.301617  |
| 18               | 1                | 0              | 0.328689                | -2.493306 | 1.746288  |
| 19               | 6                | 0              | 2.580998                | -0.269138 | -0.982507 |
| 20               | 1                | 0              | 2.179483                | 0.185004  | -1.887298 |
| 21               | 1                | 0              | 3.165681                | 0.470664  | -0.436811 |
| 22               | 1                | 0              | 3.265383                | -1.063568 | -1.283680 |
| 23               | 1                | 0              | -0.912041               | -0.118089 | 1.862147  |
| 24               | 1                | 0              | 1.499216                | 1.682327  | 0.095392  |
| 25               | 1                | 0              | 1.906817                | -1.252746 | 0.816672  |

## Standard orientation of Ts-TE-d

Cartesian coordinates of all the transition states optimized at the LC- $\omega$ PBE /6-311++G(d,p) level:

Standard orientation of transition state of Ts-TE-d

State=1-A

Charge = 1 Multiplicity = 2

Lowest Harmonic Vibrational Frequency (LHVF) = -2110.06 cm<sup>-1</sup>

Standard orientation:

| Center<br>Number | Atomic<br>Number | Atomic<br>Type | Coordinates (Angstroms) |           |           |
|------------------|------------------|----------------|-------------------------|-----------|-----------|
|                  |                  |                | X                       | Y         | Z         |
| 1                | 7                | 0              | -0.190093               | -0.028572 | -0.442604 |
| 2                | 6                | 0              | -0.617641               | 1.366052  | -0.632690 |
| 3                | 1                | 0              | -1.240523               | 1.361569  | -1.532902 |
| 4                | 1                | 0              | -1.265362               | 1.613670  | 0.207039  |
| 5                | 8                | 0              | 0.238489                | 0.202820  | 1.889328  |
| 6                | 8                | 0              | 1.410498                | -0.071339 | 1.791598  |
| 7                | 6                | 0              | -1.253598               | -1.037915 | -0.332152 |
| 8                | 1                | 0              | -0.840242               | -1.891093 | 0.202938  |
| 9                | 1                | 0              | -1.458732               | -1.367106 | -1.356758 |
| 10               | 6                | 0              | 1.081344                | -0.416069 | -0.683956 |
| 11               | 1                | 0              | 1.678077                | 0.353832  | -1.169030 |
| 12               | 1                | 0              | 1.580352                | -0.297403 | 0.483803  |
| 13               | 6                | 0              | 0.493647                | 2.381179  | -0.755338 |
| 14               | 1                | 0              | 1.070364                | 2.269264  | -1.673939 |
| 15               | 1                | 0              | 0.031026                | 3.367582  | -0.782207 |
| 16               | 1                | 0              | 1.170062                | 2.361394  | 0.100688  |
| 17               | 6                | 0              | 1.400393                | -1.836401 | -1.071966 |
| 18               | 1                | 0              | 2.474442                | -1.916447 | -1.228196 |
| 19               | 1                | 0              | 1.111776                | -2.566213 | -0.316665 |
| 20               | 1                | 0              | 0.895813                | -2.085193 | -2.008138 |
| 21               | 6                | 0              | -2.521758               | -0.563927 | 0.340614  |
| 22               | 1                | 0              | -3.037530               | 0.208663  | -0.228439 |
| 23               | 1                | 0              | -3.192585               | -1.420045 | 0.413954  |
| 24               | 1                | 0              | -2.332511               | -0.201839 | 1.351602  |



## Standard orientation of Ts-TE-e

Cartesian coordinates of all the transition states optimized at the LC- $\omega$ PBE /6-311++G(d,p) level:

Standard orientation of transition state of Ts-TE-e

State=1-A

Charge = 1 Multiplicity = 1

Lowest Harmonic Vibrational Frequency (LHVF) = -584.09 cm<sup>-1</sup>

Standard orientation:

| Center<br>Number | Atomic<br>Number | Atomic<br>Type | Coordinates (Angstroms) |           |           |
|------------------|------------------|----------------|-------------------------|-----------|-----------|
|                  |                  |                | X                       | Y         | Z         |
| 1                | 7                | 0              | -0.130575               | -0.103411 | -0.136553 |
| 2                | 6                | 0              | 0.409035                | 1.241972  | -0.177812 |
| 3                | 1                | 0              | 0.260194                | 1.612783  | -1.193354 |
| 4                | 8                | 0              | 1.833844                | 1.106167  | -0.029771 |
| 5                | 1                | 0              | 2.108104                | 1.356991  | 0.858944  |
| 6                | 6                | 0              | -0.464157               | -0.583087 | 1.206845  |
| 7                | 1                | 0              | -1.329295               | -0.048039 | 1.618457  |
| 8                | 1                | 0              | 0.384621                | -0.350384 | 1.855632  |
| 9                | 6                | 0              | -1.125990               | -0.394864 | -1.170712 |
| 10               | 1                | 0              | -1.224897               | -1.479916 | -1.239171 |
| 11               | 1                | 0              | -0.703173               | -0.071333 | -2.125282 |
| 12               | 1                | 0              | 3.209838                | -1.083587 | -1.042584 |
| 13               | 8                | 0              | 2.341406                | -1.372516 | -0.714718 |
| 14               | 1                | 0              | 1.887401                | -1.900886 | -1.392010 |
| 15               | 1                | 0              | 1.773345                | -0.558172 | -0.432945 |
| 16               | 6                | 0              | -0.124060               | 2.254839  | 0.813910  |
| 17               | 1                | 0              | 0.321355                | 3.229545  | 0.611501  |
| 18               | 1                | 0              | -1.206109               | 2.347204  | 0.722173  |
| 19               | 1                | 0              | 0.107319                | 1.975315  | 1.843840  |
| 20               | 6                | 0              | -0.720498               | -2.077040 | 1.264929  |
| 21               | 1                | 0              | -0.829299               | -2.383309 | 2.306607  |
| 22               | 1                | 0              | -1.636995               | -2.359822 | 0.744657  |
| 23               | 1                | 0              | 0.108871                | -2.641066 | 0.833312  |
| 24               | 6                | 0              | -2.499005               | 0.232406  | -0.977256 |
| 25               | 1                | 0              | -2.451830               | 1.323117  | -0.994180 |
| 26               | 1                | 0              | -3.160893               | -0.081496 | -1.786737 |
| 27               | 1                | 0              | -2.958483               | -0.077628 | -0.036509 |

## Standard orientation of Ts-TE-f

Cartesian coordinates of all the transition states optimized at the LC- $\omega$ PBE /6-311++G(d,p) level:

Standard orientation of transition state of Ts-TE-f

State=1-A

Charge = 0    Multiplicity = 1

Lowest Harmonic Vibrational Frequency (LHVF) = -507.83 cm<sup>-1</sup>

Standard orientation:

---

| Center<br>Number | Atomic<br>Number | Atomic<br>Type | Coordinates (Angstroms) |           |           |
|------------------|------------------|----------------|-------------------------|-----------|-----------|
|                  |                  |                | X                       | Y         | Z         |
| 1                | 7                | 0              | 0.493328                | 0.049904  | 0.047917  |
| 2                | 6                | 0              | -0.382090               | -0.916306 | 0.837210  |
| 3                | 1                | 0              | -2.021156               | -0.881508 | -0.275219 |
| 4                | 1                | 0              | 0.299337                | -1.677688 | 1.225462  |
| 5                | 8                | 0              | -1.267651               | -1.525793 | -0.020266 |
| 6                | 8                | 0              | -3.035258               | 0.203695  | -0.678765 |
| 7                | 1                | 0              | -2.170907               | 1.118541  | -0.813421 |
| 8                | 1                | 0              | -3.464586               | 0.024151  | -1.517817 |
| 9                | 8                | 0              | -1.275630               | 1.843010  | -0.794217 |
| 10               | 1                | 0              | -0.169049               | 0.814642  | -0.320481 |
| 11               | 1                | 0              | -1.151651               | 2.216251  | -1.669711 |
| 12               | 6                | 0              | 1.075479                | -0.596121 | -1.161784 |
| 13               | 1                | 0              | 0.233032                | -0.991189 | -1.724898 |
| 14               | 1                | 0              | 1.522245                | 0.200778  | -1.755240 |
| 15               | 6                | 0              | 1.502188                | 0.722474  | 0.910783  |
| 16               | 1                | 0              | 0.945732                | 1.304894  | 1.642285  |
| 17               | 6                | 0              | 2.081670                | -1.688223 | -0.868874 |
| 18               | 1                | 0              | 2.466916                | -2.063018 | -1.817880 |
| 19               | 1                | 0              | 2.932865                | -1.329089 | -0.288228 |
| 20               | 1                | 0              | 1.630963                | -2.530894 | -0.343391 |
| 21               | 6                | 0              | -1.070922               | -0.200436 | 1.983914  |
| 22               | 1                | 0              | -1.790817               | -0.896174 | 2.414531  |
| 23               | 1                | 0              | -0.377455               | 0.088310  | 2.772549  |
| 24               | 1                | 0              | -1.610845               | 0.680259  | 1.632016  |
| 25               | 1                | 0              | 2.057525                | -0.047024 | 1.450905  |
| 26               | 6                | 0              | 2.431139                | 1.642538  | 0.146900  |
| 27               | 1                | 0              | 3.021408                | 2.210079  | 0.866973  |
| 28               | 1                | 0              | 3.126323                | 1.102766  | -0.496287 |
| 29               | 1                | 0              | 1.870345                | 2.355731  | -0.460485 |

---

## Standard orientation of Ts-D-a

Cartesian coordinates of all the transition states optimized at the LC- $\omega$ PBE /6-311++G(d,p) level:

Standard orientation of transition state of Ts-D-a

State=1-A

Charge = 0    Multiplicity = 1

Lowest Harmonic Vibrational Frequency (LHVF) = -971.87 cm<sup>-1</sup>

Standard orientation:

| Center<br>Number | Atomic<br>Number | Atomic<br>Type | Coordinates (Angstroms) |           |           |
|------------------|------------------|----------------|-------------------------|-----------|-----------|
|                  |                  |                | X                       | Y         | Z         |
| 1                | 7                | 0              | -1.011383               | 0.092123  | -0.376734 |
| 2                | 6                | 0              | -1.474746               | -1.116555 | 0.289234  |
| 3                | 1                | 0              | -1.307347               | -1.964937 | -0.371267 |
| 4                | 1                | 0              | -2.541598               | -1.026937 | 0.505267  |
| 5                | 8                | 0              | 1.482428                | 0.320888  | -0.259710 |
| 6                | 8                | 0              | 0.590665                | -0.230079 | -1.011331 |
| 7                | 8                | 0              | 1.758346                | -0.418807 | 0.840696  |
| 8                | 6                | 0              | -0.947787               | 1.308518  | 0.410798  |
| 9                | 1                | 0              | -0.384880               | 1.112740  | 1.320178  |
| 10               | 1                | 0              | -0.452747               | 2.083182  | -0.172469 |
| 11               | 1                | 0              | -1.480564               | 0.241707  | -1.265678 |
| 12               | 1                | 0              | -0.908171               | -1.248392 | 1.207239  |
| 13               | 1                | 0              | -1.961320               | 1.629974  | 0.656442  |

## Standard orientation of Ts-D-b'

Cartesian coordinates of all the transition states optimized at the LC- $\omega$ PBE /6-311++G(d,p) level:

Standard orientation of transition state of Ts-D-b'

State=1-A

Charge = 0    Multiplicity = 1

Lowest Harmonic Vibrational Frequency (LHVF) = -490.54 cm<sup>-1</sup>

Standard orientation:

| Center<br>Number | Atomic<br>Number | Atomic<br>Type | Coordinates (Angstroms) |           |           |
|------------------|------------------|----------------|-------------------------|-----------|-----------|
|                  |                  |                | X                       | Y         | Z         |
| 1                | 7                | 0              | 0.824629                | 0.069785  | -0.367473 |
| 2                | 8                | 0              | -1.390771               | -0.563802 | -0.436451 |
| 3                | 8                | 0              | -0.177014               | -0.993533 | 0.039529  |
| 4                | 8                | 0              | -1.932300               | 0.306161  | 0.530845  |
| 5                | 6                | 0              | 0.350880                | 1.402211  | -0.139433 |
| 6                | 1                | 0              | -1.187254               | 1.044914  | 0.392356  |
| 7                | 1                | 0              | 0.926632                | -0.123626 | -1.363948 |
| 8                | 1                | 0              | 0.926162                | 1.864119  | 0.658897  |
| 9                | 6                | 0              | 2.027068                | -0.372633 | 0.357445  |
| 10               | 1                | 0              | 1.879806                | -0.156061 | 1.412668  |
| 11               | 1                | 0              | 2.175608                | -1.438520 | 0.197440  |
| 12               | 1                | 0              | 0.370670                | 1.958924  | -1.071384 |
| 13               | 1                | 0              | 2.868963                | 0.193678  | -0.033179 |

## Standard orientation of Ts-D-c

Cartesian coordinates of all the transition states optimized at the LC- $\omega$ PBE /6-311++G(d,p) level:

Standard orientation of transition state of Ts-D-c

State=1-A

Charge = 0 Multiplicity = 1

Lowest Harmonic Vibrational Frequency (LHVF) = -863.22 cm<sup>-1</sup>

Standard orientation:

| Center<br>Number | Atomic<br>Number | Atomic<br>Type | Coordinates (Angstroms) |           |           |
|------------------|------------------|----------------|-------------------------|-----------|-----------|
|                  |                  |                | X                       | Y         | Z         |
| 1                | 7                | 0              | 0.756733                | -0.003123 | 0.002075  |
| 2                | 1                | 0              | -0.061995               | 0.735372  | 0.036811  |
| 3                | 6                | 0              | 1.380982                | -0.087947 | 1.330116  |
| 4                | 1                | 0              | 2.156935                | -0.851478 | 1.307073  |
| 5                | 1                | 0              | 1.808377                | 0.881830  | 1.580966  |
| 6                | 8                | 0              | 0.197325                | -1.234881 | -0.331818 |
| 7                | 8                | 0              | -1.349898               | 1.483544  | -0.014664 |
| 8                | 1                | 0              | -1.935509               | 0.442417  | -0.027609 |
| 9                | 1                | 0              | -1.565935               | 1.989780  | 0.771547  |
| 10               | 8                | 0              | -2.238048               | -0.729340 | -0.146383 |
| 11               | 1                | 0              | -0.842412               | -1.116670 | -0.235432 |
| 12               | 1                | 0              | -2.676559               | -1.046397 | 0.646154  |
| 13               | 6                | 0              | 1.708452                | 0.382064  | -1.047998 |
| 14               | 1                | 0              | 1.167954                | 0.449472  | -1.988977 |
| 15               | 1                | 0              | 2.140231                | 1.348466  | -0.792816 |
| 16               | 1                | 0              | 2.487864                | -0.375764 | -1.114017 |
| 17               | 1                | 0              | 0.612279                | -0.354456 | 2.051980  |

## Standard orientation of Ts-D-d

Cartesian coordinates of all the transition states optimized at the LC- $\omega$ PBE /6-311++G(d,p) level:

Standard orientation of transition state of Ts-D-d

State=1-A

Charge = 0    Multiplicity = 1

Lowest Harmonic Vibrational Frequency (LHVF) = -220.12 cm<sup>-1</sup>

Standard orientation:

| Center<br>Number | Atomic<br>Number | Atomic<br>Type | Coordinates (Angstroms) |           |           |
|------------------|------------------|----------------|-------------------------|-----------|-----------|
|                  |                  |                | X                       | Y         | Z         |
| 1                | 7                | 0              | -0.833133               | 0.040225  | 0.037971  |
| 2                | 8                | 0              | 1.672227                | -0.572811 | 0.000079  |
| 3                | 8                | 0              | 0.690287                | -0.594213 | -0.795488 |
| 4                | 8                | 0              | 2.271264                | 0.620227  | 0.068827  |
| 5                | 6                | 0              | -1.117990               | 1.356130  | -0.502865 |
| 6                | 1                | 0              | -0.358063               | 2.042960  | -0.140616 |
| 7                | 1                | 0              | -1.076820               | 1.293154  | -1.588278 |
| 8                | 1                | 0              | -2.112470               | 1.674947  | -0.182265 |
| 9                | 8                | 0              | -1.782941               | -0.837959 | -0.417473 |
| 10               | 1                | 0              | -1.355456               | -1.707499 | -0.434315 |
| 11               | 6                | 0              | -0.615464               | -0.061671 | 1.467621  |
| 12               | 1                | 0              | -0.150580               | -1.024630 | 1.686054  |
| 13               | 1                | 0              | 0.053695                | 0.738177  | 1.774941  |
| 14               | 1                | 0              | -1.574350               | 0.012616  | 1.982587  |

## Standard orientation of Ts-D-d'

Cartesian coordinates of all the transition states optimized at the LC- $\omega$ PBE /6-311++G(d,p) level:

Standard orientation of transition state of Ts-D-d'

State=1-A

Charge = 0    Multiplicity = 1

Lowest Harmonic Vibrational Frequency (LHVF) = -425.60 cm<sup>-1</sup>

Standard orientation:

| Center<br>Number | Atomic<br>Number | Atomic<br>Type | Coordinates (Angstroms) |           |           |
|------------------|------------------|----------------|-------------------------|-----------|-----------|
|                  |                  |                | X                       | Y         | Z         |
| 1                | 1                | 0              | -0.164392               | -0.465765 | 1.275348  |
| 2                | 8                | 0              | -2.084877               | -0.747510 | 0.055376  |
| 3                | 8                | 0              | -1.660068               | -0.664519 | -1.127157 |
| 4                | 8                | 0              | -1.307881               | -1.390101 | 0.856452  |
| 5                | 8                | 0              | 0.502470                | 0.282843  | 1.466828  |
| 6                | 7                | 0              | 1.071503                | 0.689088  | 0.315690  |
| 7                | 6                | 0              | 0.203973                | 1.249185  | -0.635280 |
| 8                | 1                | 0              | 0.799340                | 1.620232  | -1.471055 |
| 9                | 1                | 0              | -0.453345               | 0.407579  | -1.091654 |
| 10               | 6                | 0              | 2.200009                | -0.118289 | -0.112826 |
| 11               | 1                | 0              | 2.708095                | 0.444944  | -0.897239 |
| 12               | 1                | 0              | 2.878823                | -0.183166 | 0.739212  |
| 13               | 6                | 0              | -0.754081               | 2.287416  | -0.096227 |
| 14               | 1                | 0              | -1.346067               | 2.692433  | -0.916979 |
| 15               | 1                | 0              | -1.436714               | 1.866887  | 0.643022  |
| 16               | 1                | 0              | -0.203702               | 3.103762  | 0.374463  |
| 17               | 6                | 0              | 1.829419                | -1.511351 | -0.604016 |
| 18               | 1                | 0              | 1.171142                | -1.466954 | -1.472981 |
| 19               | 1                | 0              | 2.738864                | -2.041534 | -0.891046 |
| 20               | 1                | 0              | 1.334363                | -2.089502 | 0.177185  |

## Standard orientation of Ts-D-e

Cartesian coordinates of all the transition states optimized at the LC- $\omega$ PBE /6-311++G(d,p) level:

Standard orientation of transition state of Ts-D-e

State=1-A

Charge = 0 Multiplicity = 1

Lowest Harmonic Vibrational Frequency (LHVF) = -584.69 cm<sup>-1</sup>

Standard orientation:

| Center<br>Number | Atomic<br>Number | Atomic<br>Type | Coordinates (Angstroms) |           |           |
|------------------|------------------|----------------|-------------------------|-----------|-----------|
|                  |                  |                | X                       | Y         | Z         |
| 1                | 7                | 0              | 1.039447                | 0.124537  | 0.009889  |
| 2                | 1                | 0              | -3.160506               | 0.459861  | 0.399585  |
| 3                | 6                | 0              | 0.570051                | 0.764344  | -1.219281 |
| 4                | 1                | 0              | 0.823691                | 0.114930  | -2.050936 |
| 5                | 1                | 0              | -0.500039               | 0.944385  | -1.114499 |
| 6                | 1                | 0              | 1.116625                | 1.709279  | -1.282473 |
| 7                | 8                | 0              | -0.931791               | -1.415540 | 0.041424  |
| 8                | 8                | 0              | -2.321470               | 0.543881  | -0.056146 |
| 9                | 1                | 0              | -1.038341               | -1.949455 | -0.748808 |
| 10               | 1                | 0              | -1.683505               | -0.533014 | -0.011443 |
| 11               | 6                | 0              | 0.543008                | 0.642392  | 1.281289  |
| 12               | 1                | 0              | 0.806396                | -0.068387 | 2.057370  |
| 13               | 1                | 0              | 1.056366                | 1.596135  | 1.428271  |
| 14               | 1                | 0              | -0.532719               | 0.798147  | 1.170300  |
| 15               | 8                | 0              | 1.897955                | -0.676347 | -0.021357 |



## Standard orientation of Ts-D-f

Cartesian coordinates of all the transition states optimized at the LC- $\omega$ PBE /6-311++G(d,p) level:

Standard orientation of transition state of Ts-D-f

State=1-A

Charge = 0    Multiplicity = 1

Lowest Harmonic Vibrational Frequency (LHVF) = -336.70 cm<sup>-1</sup>

Standard orientation:

| Center<br>Number | Atomic<br>Number | Atomic<br>Type | Coordinates (Angstroms) |           |           |
|------------------|------------------|----------------|-------------------------|-----------|-----------|
|                  |                  |                | X                       | Y         | Z         |
| 1                | 7                | 0              | 0.922581                | 0.301889  | 0.132192  |
| 2                | 8                | 0              | -1.457664               | -0.389256 | 0.363426  |
| 3                | 8                | 0              | -1.565910               | 0.692531  | -0.293664 |
| 4                | 8                | 0              | -0.953973               | -1.322850 | -0.340734 |
| 5                | 6                | 0              | 1.865231                | -0.674125 | -0.434781 |
| 6                | 1                | 0              | 1.725809                | -1.615323 | 0.086162  |
| 7                | 1                | 0              | 1.674572                | -0.787335 | -1.498498 |
| 8                | 1                | 0              | 2.871765                | -0.291906 | -0.267836 |
| 9                | 8                | 0              | 0.660981                | 0.244527  | 1.356173  |
| 10               | 6                | 0              | 0.341169                | 1.241638  | -0.596129 |
| 11               | 1                | 0              | 0.055383                | 2.144936  | -0.077857 |
| 12               | 1                | 0              | 0.508539                | 1.231706  | -1.663458 |

## Standard orientation of Ts-D-g

Cartesian coordinates of all the transition states optimized at the LC- $\omega$ PBE /6-311++G(d,p) level:

Standard orientation of transition state of Ts-D-g

State=1-A

Charge = 0    Multiplicity = 1

Lowest Harmonic Vibrational Frequency (LHVF) = -202.90 cm<sup>-1</sup>

Standard orientation:

---

| Center<br>Number | Atomic<br>Number | Atomic<br>Type | Coordinates (Angstroms) |           |           |
|------------------|------------------|----------------|-------------------------|-----------|-----------|
|                  |                  |                | X                       | Y         | Z         |
| 1                | 7                | 0              | -0.932531               | 0.088235  | -0.063749 |
| 2                | 8                | 0              | 1.684378                | -0.615045 | 0.090077  |
| 3                | 8                | 0              | 1.176914                | 1.037550  | 0.432117  |
| 4                | 8                | 0              | 0.826195                | -1.094909 | -0.712225 |
| 5                | 6                | 0              | -1.015002               | -0.467592 | 1.284677  |
| 6                | 1                | 0              | -1.714967               | -1.296550 | 1.256744  |
| 7                | 1                | 0              | -0.017158               | -0.755726 | 1.605255  |
| 8                | 1                | 0              | -1.382559               | 0.340135  | 1.921621  |
| 9                | 8                | 0              | -1.794038               | -0.101243 | -0.854476 |
| 10               | 6                | 0              | 0.118927                | 1.157964  | -0.352757 |
| 11               | 1                | 0              | 0.276987                | 1.044428  | -1.432220 |
| 12               | 1                | 0              | -0.405724               | 2.097009  | -0.140623 |

---

## Standard orientation of Ts-D-h

Cartesian coordinates of all the transition states optimized at the LC- $\omega$ PBE /6-311++G(d,p) level:

Standard orientation of transition state of Ts-D-h

State=1-A

Charge = 0 Multiplicity = 1

Lowest Harmonic Vibrational Frequency (LHVF) = -212.06 cm<sup>-1</sup>

Standard orientation:

| Center<br>Number | Atomic<br>Number | Atomic<br>Type | Coordinates (Angstroms) |           |           |
|------------------|------------------|----------------|-------------------------|-----------|-----------|
|                  |                  |                | X                       | Y         | Z         |
| 1                | 8                | 0              | -1.620678               | 0.329981  | 0.342321  |
| 2                | 8                | 0              | -0.772888               | -0.575567 | 0.731242  |
| 3                | 8                | 0              | -2.240556               | 0.034124  | -0.720715 |
| 4                | 6                | 0              | 1.607499                | 1.167150  | 0.057651  |
| 5                | 1                | 0              | 0.839076                | 1.697257  | 0.616904  |
| 6                | 1                | 0              | 2.541032                | 1.085767  | 0.612713  |
| 7                | 1                | 0              | 1.761193                | 1.678535  | -0.894607 |
| 8                | 7                | 0              | 1.089468                | -0.162223 | -0.270488 |
| 9                | 8                | 0              | 1.832551                | -1.079650 | -0.201286 |

## Standard orientation of Ts-D-i

Cartesian coordinates of all the transition states optimized at the LC- $\omega$ PBE /6-311++G(d,p) level:

Standard orientation of transition state of Ts-D-i

State=1-A

Charge = 0    Multiplicity = 1

Lowest Harmonic Vibrational Frequency (LHVF) = -266.75 cm<sup>-1</sup>

Standard orientation:

| Center<br>Number | Atomic<br>Number | Atomic<br>Type | Coordinates (Angstroms) |           |           |
|------------------|------------------|----------------|-------------------------|-----------|-----------|
|                  |                  |                | X                       | Y         | Z         |
| 1                | 7                | 0              | 1.576595                | 0.418081  | -0.078117 |
| 2                | 8                | 0              | -1.436314               | -0.480650 | -0.525934 |
| 3                | 8                | 0              | -1.457585               | -1.041192 | 0.652112  |
| 4                | 8                | 0              | -1.221735               | 1.121324  | -0.312892 |
| 5                | 6                | 0              | 1.728744                | -1.018348 | -0.260464 |
| 6                | 1                | 0              | 0.900190                | -1.514284 | 0.243100  |
| 7                | 1                | 0              | 1.698760                | -1.247227 | -1.324402 |
| 8                | 6                | 0              | 0.714017                | 0.955718  | 0.703684  |
| 9                | 1                | 0              | 0.711129                | 2.030078  | 0.826278  |
| 10               | 1                | 0              | -1.055934               | 1.387496  | -1.228072 |
| 11               | 1                | 0              | 0.135822                | 0.314218  | 1.358572  |
| 12               | 1                | 0              | 2.684542                | -1.339108 | 0.152680  |
| 13               | 1                | 0              | 2.157833                | 1.022185  | -0.646944 |

## Standard orientation of Ts-D-j

Cartesian coordinates of all the transition states optimized at the LC- $\omega$ PBE /6-311++G(d,p) level:

Standard orientation of transition state of Ts-D-j

State=1-A

Charge = 0 Multiplicity = 1

Lowest Harmonic Vibrational Frequency (LHVF) = -505.72 cm<sup>-1</sup>

Standard orientation:

| Center<br>Number | Atomic<br>Number | Atomic<br>Type | Coordinates (Angstroms) |           |           |
|------------------|------------------|----------------|-------------------------|-----------|-----------|
|                  |                  |                | X                       | Y         | Z         |
| 1                | 7                | 0              | 1.128708                | 0.404369  | 0.467046  |
| 2                | 6                | 0              | 0.708946                | -1.024165 | 0.673498  |
| 3                | 1                | 0              | -0.946138               | -1.151644 | -0.363836 |
| 4                | 1                | 0              | 1.620892                | -1.605638 | 0.824214  |
| 5                | 8                | 0              | 0.021179                | -1.494114 | -0.411083 |
| 6                | 8                | 0              | -2.281095               | -0.467807 | -0.158290 |
| 7                | 1                | 0              | -1.791167               | 0.695889  | 0.014483  |
| 8                | 1                | 0              | -2.849546               | -0.495017 | -0.930322 |
| 9                | 8                | 0              | -1.180468               | 1.633923  | 0.253992  |
| 10               | 1                | 0              | 0.227345                | 0.998473  | 0.358257  |
| 11               | 1                | 0              | -1.301119               | 2.278966  | -0.446295 |
| 12               | 6                | 0              | 2.007317                | 0.597015  | -0.699677 |
| 13               | 1                | 0              | 1.485141                | 0.246814  | -1.586233 |
| 14               | 1                | 0              | 2.237524                | 1.655669  | -0.799279 |
| 15               | 1                | 0              | 0.115802                | -1.026389 | 1.593605  |
| 16               | 1                | 0              | 2.926754                | 0.029047  | -0.564412 |
| 17               | 1                | 0              | 1.599043                | 0.730135  | 1.310619  |

## Standard orientation of Ts-D-j'

Cartesian coordinates of all the transition states optimized at the LC- $\omega$ PBE /6-311++G(d,p) level:

Standard orientation of transition state of Ts-D-j'

State=1-A

Charge = 0 Multiplicity = 1

Lowest Harmonic Vibrational Frequency (LHVF) = -256.11 cm<sup>-1</sup>

Standard orientation:

| Center<br>Number | Atomic<br>Number | Atomic<br>Type | Coordinates (Angstroms) |           |           |
|------------------|------------------|----------------|-------------------------|-----------|-----------|
|                  |                  |                | X                       | Y         | Z         |
| 1                | 7                | 0              | -0.607324               | 0.760335  | -0.364510 |
| 2                | 6                | 0              | -1.675083               | -0.228874 | -0.565189 |
| 3                | 8                | 0              | 1.865377                | 0.109851  | -0.177138 |
| 4                | 8                | 0              | 0.929865                | 0.061765  | -1.034838 |
| 5                | 8                | 0              | 1.907681                | -0.965155 | 0.630764  |
| 6                | 6                | 0              | -0.361868               | 1.299682  | 0.952852  |
| 7                | 1                | 0              | -0.989497               | 2.174721  | 1.129098  |
| 8                | 1                | 0              | -0.539423               | 0.534534  | 1.703128  |
| 9                | 1                | 0              | 0.687604                | 1.604240  | 1.002631  |
| 10               | 1                | 0              | -2.630350               | 0.305034  | -0.580197 |
| 11               | 8                | 0              | -1.651175               | -1.226292 | 0.392548  |
| 12               | 1                | 0              | -2.283172               | -1.031743 | 1.089575  |
| 13               | 1                | 0              | -1.495698               | -0.670046 | -1.546978 |
| 14               | 1                | 0              | -0.690477               | 1.494717  | -1.062363 |

## Standard orientation of Ts-D-j''

Cartesian coordinates of all the transition states optimized at the LC- $\omega$ PBE/6-311++G(d,p) level:

Standard orientation of transition state of Ts-D-j''

State=1-A

Charge = 0    Multiplicity = 1

Lowest Harmonic Vibrational Frequency (LHVF) = -293.80 cm<sup>-1</sup>

Standard orientation:

| Center<br>Number | Atomic<br>Number | Atomic<br>Type | Coordinates (Angstroms) |           |           |
|------------------|------------------|----------------|-------------------------|-----------|-----------|
|                  |                  |                | X                       | Y         | Z         |
| 1                | 1                | 0              | 1.427655                | -2.439413 | -0.833119 |
| 2                | 1                | 0              | -0.499789               | -1.149143 | -0.238626 |
| 3                | 8                | 0              | 0.411464                | 1.864783  | 0.275329  |
| 4                | 8                | 0              | 1.038365                | -1.978545 | -0.086709 |
| 5                | 1                | 0              | 0.707207                | 2.672551  | -0.153941 |
| 6                | 1                | 0              | 1.600594                | -1.132416 | 0.079473  |
| 7                | 1                | 0              | -1.551856               | 1.486679  | -1.046519 |
| 8                | 8                | 0              | 2.209203                | 0.218600  | 0.399749  |
| 9                | 1                | 0              | 1.269658                | 1.176553  | 0.325532  |
| 10               | 1                | 0              | 2.983020                | 0.440914  | -0.121408 |
| 11               | 6                | 0              | -0.864361               | 0.655824  | -0.960068 |
| 12               | 1                | 0              | -0.039754               | 0.565465  | -1.652934 |
| 13               | 7                | 0              | -1.187496               | -0.371660 | -0.263806 |
| 14               | 6                | 0              | -2.313199               | -0.416848 | 0.649854  |
| 15               | 1                | 0              | -1.954803               | -0.388963 | 1.679230  |
| 16               | 1                | 0              | -2.965815               | 0.435816  | 0.471471  |
| 17               | 1                | 0              | -2.870547               | -1.338986 | 0.491814  |

## Standard orientation of Ts-D-k

Cartesian coordinates of all the transition states optimized at the LC- $\omega$ PBE/6-311+G(d) level:

Standard orientation of transition state of Ts-D-k

State=1-A

Charge = 0    Multiplicity = 1

Lowest Harmonic Vibrational Frequency (LHVF) = -1069.40 cm<sup>-1</sup>

Standard orientation:

| Center<br>Number | Atomic<br>Number | Atomic<br>Type | Coordinates (Angstroms) |           |           |
|------------------|------------------|----------------|-------------------------|-----------|-----------|
|                  |                  |                | X                       | Y         | Z         |
| 1                | 7                | 0              | 0.479351                | 0.070916  | 0.392373  |
| 2                | 1                | 0              | 0.609461                | 0.103418  | 1.402098  |
| 3                | 8                | 0              | 0.114365                | 1.316361  | -0.036352 |
| 4                | 6                | 0              | -0.779244               | -0.862809 | 0.075957  |
| 5                | 1                | 0              | -0.446437               | -1.487973 | -0.764017 |
| 6                | 1                | 0              | -0.912060               | -1.473914 | 0.975713  |
| 7                | 8                | 0              | -1.766712               | -0.010608 | -0.201816 |
| 8                | 1                | 0              | -0.994248               | 0.999583  | -0.241418 |
| 9                | 6                | 0              | 1.712415                | -0.396647 | -0.245606 |
| 10               | 1                | 0              | 1.916932                | -1.411101 | 0.095374  |
| 11               | 1                | 0              | 1.561087                | -0.380956 | -1.321965 |
| 12               | 1                | 0              | 2.529557                | 0.265251  | 0.030846  |



## Standard orientation of Ts-D-1

Cartesian coordinates of all the transition states optimized at the LC- $\omega$ PBE /6-311++G(d,p) level:

Standard orientation of transition state of Ts-D-1

State=1-A

Charge = 0    Multiplicity = 1

Lowest Harmonic Vibrational Frequency (LHVF) = -1820.47 cm<sup>-1</sup>

Standard orientation:

| Center<br>Number | Atomic<br>Number | Atomic<br>Type | Coordinates (Angstroms) |           |           |
|------------------|------------------|----------------|-------------------------|-----------|-----------|
|                  |                  |                | X                       | Y         | Z         |
| 1                | 7                | 0              | -0.799748               | 0.184364  | 0.447947  |
| 2                | 8                | 0              | 1.194705                | -0.870753 | 0.240388  |
| 3                | 8                | 0              | 1.765855                | 0.042136  | -0.289830 |
| 4                | 6                | 0              | -1.623544               | -0.756328 | -0.290277 |
| 5                | 1                | 0              | -1.396421               | -0.683776 | -1.351858 |
| 6                | 1                | 0              | -1.432543               | -1.763157 | 0.072666  |
| 7                | 1                | 0              | -2.670972               | -0.499342 | -0.121248 |
| 8                | 6                | 0              | -0.345914               | 1.336119  | -0.055100 |
| 9                | 1                | 0              | -0.146049               | 2.125204  | 0.665238  |
| 10               | 1                | 0              | 0.856811                | 1.015764  | -0.351704 |
| 11               | 1                | 0              | -0.725587               | 1.612983  | -1.035530 |
| 12               | 1                | 0              | -0.754732               | 0.051964  | 1.454616  |

## Standard orientation of Ts-D-m

Cartesian coordinates of all the transition states optimized at the LC- $\omega$ PBE /6-311++G(d,p) level:

Standard orientation of transition state of Ts-D-m

State=1-A

Charge = 0    Multiplicity = 1

Lowest Harmonic Vibrational Frequency (LHVF) = -580.84 cm<sup>-1</sup>

Standard orientation:

---

| Center<br>Number | Atomic<br>Number | Atomic<br>Type | Coordinates (Angstroms) |           |           |
|------------------|------------------|----------------|-------------------------|-----------|-----------|
|                  |                  |                | X                       | Y         | Z         |
| 1                | 7                | 0              | 0.721810                | -0.342159 | 0.536906  |
| 2                | 6                | 0              | 0.682984                | 1.078047  | 0.333378  |
| 3                | 1                | 0              | 1.529683                | 1.451830  | -0.249164 |
| 4                | 1                | 0              | 0.650373                | 1.587586  | 1.295495  |
| 5                | 8                | 0              | -0.537997               | 1.381099  | -0.350293 |
| 6                | 1                | 0              | -0.366013               | 1.619659  | -1.265974 |
| 7                | 6                | 0              | 1.500198                | -1.097972 | -0.438412 |
| 8                | 1                | 0              | 2.558608                | -0.816319 | -0.439205 |
| 9                | 1                | 0              | 1.420411                | -2.162387 | -0.219035 |
| 10               | 1                | 0              | 1.097350                | -0.933585 | -1.439365 |
| 11               | 1                | 0              | -2.802139               | -0.319766 | 0.053182  |
| 12               | 8                | 0              | -1.980728               | -0.833548 | -0.027229 |
| 13               | 1                | 0              | -1.920803               | -1.495194 | 0.682210  |
| 14               | 1                | 0              | -1.157409               | -0.220997 | -0.009783 |
| 15               | 1                | 0              | 0.987973                | -0.576578 | 1.483673  |

---

## Standard orientation of Ts-D-n

Cartesian coordinates of all the transition states optimized at the LC- $\omega$ PBE /6-311++G(d,p) level:

Standard orientation of transition state of Ts-D-n

State=1-A

Charge = 0    Multiplicity = 1

Lowest Harmonic Vibrational Frequency (LHVF) = -739.23 cm<sup>-1</sup>

Standard orientation:

| Center<br>Number | Atomic<br>Number | Atomic<br>Type | Coordinates (Angstroms) |           |           |
|------------------|------------------|----------------|-------------------------|-----------|-----------|
|                  |                  |                | X                       | Y         | Z         |
| 1                | 8                | 0              | 1.700500                | 0.118648  | -0.109345 |
| 2                | 8                | 0              | 0.827086                | 0.707155  | 0.698945  |
| 3                | 8                | 0              | 1.534579                | -1.128622 | -0.190289 |
| 4                | 7                | 0              | -1.182716               | -0.054885 | -0.646672 |
| 5                | 6                | 0              | -0.756784               | 1.136223  | -0.320100 |
| 6                | 1                | 0              | -1.168291               | 1.674221  | 0.537183  |
| 7                | 1                | 0              | -0.261269               | 1.727458  | -1.085202 |
| 8                | 6                | 0              | -1.959236               | -0.752541 | 0.342106  |
| 9                | 1                | 0              | -2.899050               | -1.071560 | -0.115415 |
| 10               | 1                | 0              | -1.425317               | -1.664022 | 0.623916  |
| 11               | 1                | 0              | -2.168273               | -0.161439 | 1.239696  |

## Standard orientation of Ts-D-n'

Cartesian coordinates of all the transition states optimized at the LC- $\omega$ PBE /6-311++G(d,p) level:

Standard orientation of transition state of Ts-D-n'

State=1-A

Charge = 0    Multiplicity = 1

Lowest Harmonic Vibrational Frequency (LHVF) = -435.90 cm<sup>-1</sup>

Standard orientation:

| Center<br>Number | Atomic<br>Number | Atomic<br>Type | Coordinates (Angstroms) |           |           |
|------------------|------------------|----------------|-------------------------|-----------|-----------|
|                  |                  |                | X                       | Y         | Z         |
| 1                | 7                | 0              | -0.955378               | 0.076734  | -0.599072 |
| 2                | 8                | 0              | 1.526845                | -0.326246 | -0.150561 |
| 3                | 8                | 0              | 1.236651                | 0.598172  | 0.701654  |
| 4                | 8                | 0              | 0.593113                | -1.166274 | -0.235415 |
| 5                | 6                | 0              | -1.846747               | -0.425960 | 0.426612  |
| 6                | 1                | 0              | -1.854229               | -1.515024 | 0.392741  |
| 7                | 1                | 0              | -1.569154               | -0.096008 | 1.431401  |
| 8                | 1                | 0              | -2.856560               | -0.079377 | 0.196605  |
| 9                | 6                | 0              | -0.383812               | 1.221646  | -0.367776 |
| 10               | 1                | 0              | 0.220749                | 1.669417  | -1.150935 |
| 11               | 1                | 0              | -0.722678               | 1.864526  | 0.445258  |

## Standard orientation of Ts-D-n''

Cartesian coordinates of all the transition states optimized at the LC- $\omega$ PBE /6-311++G(d,p) level:

Standard orientation of transition state of Ts-D-n''

State=1-A

Charge = 0 Multiplicity = 1

Lowest Harmonic Vibrational Frequency (LHVF) = -695.69 cm<sup>-1</sup>

Standard orientation:

| Center<br>Number | Atomic<br>Number | Atomic<br>Type | Coordinates (Angstroms) |           |           |
|------------------|------------------|----------------|-------------------------|-----------|-----------|
|                  |                  |                | X                       | Y         | Z         |
| 1                | 8                | 0              | 1.504408                | 0.449005  | -0.225965 |
| 2                | 8                | 0              | 0.382224                | -0.121890 | -0.850084 |
| 3                | 8                | 0              | 2.026507                | -0.343779 | 0.599729  |
| 4                | 6                | 0              | -1.403524               | 1.181188  | 0.201298  |
| 5                | 1                | 0              | -2.110901               | 1.225526  | 1.028440  |
| 6                | 1                | 0              | -0.639183               | 1.941030  | 0.356144  |
| 7                | 1                | 0              | -1.921926               | 1.364420  | -0.741919 |
| 8                | 7                | 0              | -0.779097               | -0.130149 | 0.223491  |
| 9                | 6                | 0              | -1.521992               | -1.212480 | 0.067699  |
| 10               | 1                | 0              | -2.595835               | -1.122778 | -0.057584 |
| 11               | 1                | 0              | -1.030491               | -2.176090 | 0.047058  |

## Standard orientation of Ts-D-o

Cartesian coordinates of all the transition states optimized at the LC- $\omega$ PBE /6-311++G(d,p) level:

Standard orientation of transition state of Ts-D-o

State=1-A

Charge = 0    Multiplicity = 1

Lowest Harmonic Vibrational Frequency (LHVF) = -649.66 cm<sup>-1</sup>

Standard orientation:

| Center<br>Number | Atomic<br>Number | Atomic<br>Type | Coordinates (Angstroms) |           |           |
|------------------|------------------|----------------|-------------------------|-----------|-----------|
|                  |                  |                | X                       | Y         | Z         |
| 1                | 8                | 0              | -1.373310               | 0.090637  | -0.470472 |
| 2                | 8                | 0              | -0.363965               | -0.744947 | 0.588560  |
| 3                | 8                | 0              | -2.330809               | 0.502512  | 0.113037  |
| 4                | 7                | 0              | 1.860575                | -0.152216 | -0.148154 |
| 5                | 6                | 0              | 0.771410                | -1.073787 | -0.153318 |
| 6                | 1                | 0              | 1.113858                | -2.036230 | 0.245695  |
| 7                | 1                | 0              | 0.486922                | -1.261019 | -1.202433 |
| 8                | 6                | 0              | 1.510660                | 1.212126  | 0.101714  |
| 9                | 1                | 0              | 2.412428                | 1.814583  | 0.202756  |
| 10               | 1                | 0              | 0.928139                | 1.606780  | -0.742605 |
| 11               | 1                | 0              | 0.886878                | 1.325752  | 0.994291  |

## Standard orientation of Ts-D-p

Cartesian coordinates of all the transition states optimized at the LC- $\omega$ PBE /6-311++G(d,p) level:

Standard orientation of transition state of Ts-D-p

State=1-A

Charge = 0    Multiplicity = 3

Lowest Harmonic Vibrational Frequency (LHVF) = -959.41 cm<sup>-1</sup>

Standard orientation:

| Center<br>Number | Atomic<br>Number | Atomic<br>Type | Coordinates (Angstroms) |           |           |
|------------------|------------------|----------------|-------------------------|-----------|-----------|
|                  |                  |                | X                       | Y         | Z         |
| 1                | 7                | 0              | -0.903650               | 0.058058  | -0.669444 |
| 2                | 8                | 0              | 1.527774                | -0.518093 | 0.102568  |
| 3                | 8                | 0              | 0.682597                | 1.104808  | 0.667414  |
| 4                | 8                | 0              | 0.594363                | -1.264633 | -0.225282 |
| 5                | 6                | 0              | -1.670634               | -0.446602 | 0.449187  |
| 6                | 1                | 0              | -1.813790               | -1.513235 | 0.282456  |
| 7                | 1                | 0              | -1.209777               | -0.266891 | 1.419531  |
| 8                | 1                | 0              | -2.661275               | 0.010882  | 0.389860  |
| 9                | 6                | 0              | 0.014403                | 1.070065  | -0.442717 |
| 10               | 1                | 0              | 0.508519                | 1.402022  | -1.362389 |
| 11               | 1                | 0              | -0.998612               | 1.643383  | -0.439779 |

## Standard orientation of Ts-D-p'

Cartesian coordinates of all the transition states optimized at the LC- $\omega$ PBE/6-311++G(d,p) level:

Standard orientation of transition state of Ts-D-p'

State=1-A

Charge = 0    Multiplicity = 3

Lowest Harmonic Vibrational Frequency (LHVF) = -152.21 cm<sup>-1</sup>

Standard orientation:

| Center<br>Number | Atomic<br>Number | Atomic<br>Type | Coordinates (Angstroms) |           |           |
|------------------|------------------|----------------|-------------------------|-----------|-----------|
|                  |                  |                | X                       | Y         | Z         |
| 1                | 7                | 0              | -0.734950               | 0.016130  | -0.334389 |
| 2                | 8                | 0              | 1.600246                | -0.645308 | 0.259943  |
| 3                | 8                | 0              | 1.417863                | 0.552516  | 0.550426  |
| 4                | 8                | 0              | -0.199726               | -1.034046 | -0.772208 |
| 5                | 6                | 0              | -1.721842               | -0.136425 | 0.736323  |
| 6                | 1                | 0              | -2.507937               | -0.793072 | 0.371592  |
| 7                | 1                | 0              | -1.219364               | -0.592642 | 1.588128  |
| 8                | 1                | 0              | -2.129641               | 0.834876  | 1.001790  |
| 9                | 6                | 0              | -0.182998               | 1.167123  | -0.617325 |
| 10               | 1                | 0              | 0.464195                | 1.206928  | -1.480211 |
| 11               | 1                | 0              | -0.580627               | 2.061513  | -0.159848 |



## Standard orientation of Ts-DE-a

Cartesian coordinates of all the transition states optimized at the LC- $\omega$ PBE /6-311++G(d,p) level:

Standard orientation of transition state of Ts-DE-a

State=1-A

Charge = 0    Multiplicity = 1

Lowest Harmonic Vibrational Frequency (LHVF) = -938.85 cm<sup>-1</sup>

Standard orientation:

| Center<br>Number | Atomic<br>Number | Atomic<br>Type | Coordinates (Angstroms) |           |           |
|------------------|------------------|----------------|-------------------------|-----------|-----------|
|                  |                  |                | X                       | Y         | Z         |
| 1                | 7                | 0              | 0.505362                | 0.156629  | -0.287171 |
| 2                | 6                | 0              | 0.586783                | 1.297474  | 0.629840  |
| 3                | 1                | 0              | 1.584321                | 1.280865  | 1.079746  |
| 4                | 8                | 0              | -1.751649               | -0.931758 | -0.408681 |
| 5                | 8                | 0              | -1.147699               | 0.104019  | -0.881049 |
| 6                | 8                | 0              | -2.177157               | -0.742156 | 0.863648  |
| 7                | 6                | 0              | 0.882933                | -1.151034 | 0.230726  |
| 8                | 1                | 0              | 0.673493                | -1.152179 | 1.299920  |
| 9                | 1                | 0              | 0.211684                | -1.881044 | -0.231943 |
| 10               | 6                | 0              | 2.332037                | -1.481054 | -0.072230 |
| 11               | 1                | 0              | 2.563750                | -2.469772 | 0.324379  |
| 12               | 1                | 0              | 2.516486                | -1.498498 | -1.148150 |
| 13               | 1                | 0              | 3.012362                | -0.763565 | 0.389039  |
| 14               | 1                | 0              | 0.960114                | 0.351668  | -1.176985 |
| 15               | 6                | 0              | 0.340728                | 2.607730  | -0.083240 |
| 16               | 1                | 0              | 0.412467                | 3.425313  | 0.634131  |
| 17               | 1                | 0              | 1.085458                | 2.781529  | -0.863043 |
| 18               | 1                | 0              | -0.652013               | 2.632456  | -0.531870 |
| 19               | 1                | 0              | -0.148508               | 1.117294  | 1.413055  |

## Standard orientation of Ts-DE-b'

Cartesian coordinates of all the transition states optimized at the LC- $\omega$ PBE /6-311++G(d,p) level:

Standard orientation of transition state of Ts-DE-b'

State=1-A

Charge = 0 Multiplicity = 1

Lowest Harmonic Vibrational Frequency (LHVF) = -763.86 cm<sup>-1</sup>

Standard orientation:

| Center<br>Number | Atomic<br>Number | Atomic<br>Type | Coordinates (Angstroms) |           |           |
|------------------|------------------|----------------|-------------------------|-----------|-----------|
|                  |                  |                | X                       | Y         | Z         |
| 1                | 7                | 0              | 0.380009                | -0.176472 | -0.259935 |
| 2                | 8                | 0              | -1.883562               | -0.589818 | -0.556800 |
| 3                | 8                | 0              | -0.703627               | -1.265040 | -0.393386 |
| 4                | 8                | 0              | -2.345225               | -0.247398 | 0.734715  |
| 5                | 6                | 0              | -0.050529               | 0.955735  | 0.490904  |
| 6                | 1                | 0              | -1.528562               | 0.434426  | 0.899697  |
| 7                | 1                | 0              | 0.528861                | 0.052059  | -1.245229 |
| 8                | 1                | 0              | 0.531488                | 1.002569  | 1.409710  |
| 9                | 6                | 0              | 1.521647                | -0.969390 | 0.252323  |
| 10               | 1                | 0              | 1.304528                | -1.165780 | 1.301812  |
| 11               | 6                | 0              | -0.077868               | 2.234223  | -0.316867 |
| 12               | 1                | 0              | -0.760597               | 2.158787  | -1.168006 |
| 13               | 1                | 0              | -0.455483               | 3.043931  | 0.310170  |
| 14               | 1                | 0              | 0.902335                | 2.551695  | -0.697062 |
| 15               | 1                | 0              | 1.525311                | -1.914306 | -0.291133 |
| 16               | 6                | 0              | 2.820151                | -0.218358 | 0.065822  |
| 17               | 1                | 0              | 2.816392                | 0.726989  | 0.608691  |
| 18               | 1                | 0              | 3.635869                | -0.830327 | 0.450669  |
| 19               | 1                | 0              | 3.018706                | -0.019948 | -0.989095 |

## Standard orientation of Ts-DE-c

Cartesian coordinates of all the transition states optimized at the LC- $\omega$ PBE /6-311++G(d,p) level:

Standard orientation of transition state of Ts-DE-c

State=1-A

Charge = 0    Multiplicity = 1

Lowest Harmonic Vibrational Frequency (LHVF) = -838.08 cm<sup>-1</sup>

Standard orientation:

| Center<br>Number | Atomic<br>Number | Atomic<br>Type | Coordinates (Angstroms) |           |           |
|------------------|------------------|----------------|-------------------------|-----------|-----------|
|                  |                  |                | X                       | Y         | Z         |
| 1                | 7                | 0              | -0.385625               | -0.004707 | 0.115298  |
| 2                | 1                | 0              | 0.477822                | -0.204173 | 0.761775  |
| 3                | 6                | 0              | -0.728005               | 1.434690  | 0.176652  |
| 4                | 1                | 0              | -1.504645               | 1.611225  | -0.567237 |
| 5                | 1                | 0              | -1.146361               | 1.613165  | 1.168822  |
| 6                | 8                | 0              | -0.025089               | -0.346831 | -1.185332 |
| 7                | 8                | 0              | 1.750514                | -0.712987 | 1.403581  |
| 8                | 1                | 0              | 2.220444                | -0.842336 | 0.300994  |
| 9                | 1                | 0              | 2.255840                | -0.086663 | 1.926021  |
| 10               | 8                | 0              | 2.379124                | -0.975498 | -0.885823 |
| 11               | 1                | 0              | 0.989438                | -0.596345 | -1.150784 |
| 12               | 1                | 0              | 3.017718                | -0.335330 | -1.207412 |
| 13               | 6                | 0              | -1.473581               | -0.899734 | 0.580515  |
| 14               | 1                | 0              | -1.065061               | -1.907673 | 0.510709  |
| 15               | 1                | 0              | -1.627411               | -0.669191 | 1.636362  |
| 16               | 6                | 0              | -2.753228               | -0.773065 | -0.213902 |
| 17               | 1                | 0              | -3.442551               | -1.553046 | 0.110763  |
| 18               | 1                | 0              | -3.244808               | 0.187483  | -0.056773 |
| 19               | 1                | 0              | -2.565654               | -0.908266 | -1.279227 |
| 20               | 6                | 0              | 0.481347                | 2.304755  | -0.076498 |
| 21               | 1                | 0              | 0.901416                | 2.112789  | -1.063872 |
| 22               | 1                | 0              | 0.182000                | 3.352219  | -0.032038 |
| 23               | 1                | 0              | 1.255590                | 2.141732  | 0.674808  |

## Standard orientation of Ts-DE-d

Cartesian coordinates of all the transition states optimized at the LC- $\omega$ PBE /6-311++G(d,p) level:

Standard orientation of transition state of Ts-DE-d

State=1-A

Charge = 0 Multiplicity = 1

Lowest Harmonic Vibrational Frequency (LHVF) = -982.69 cm<sup>-1</sup>

Standard orientation:

| Center<br>Number | Atomic<br>Number | Atomic<br>Type | Coordinates (Angstroms) |           |           |
|------------------|------------------|----------------|-------------------------|-----------|-----------|
|                  |                  |                | X                       | Y         | Z         |
| 1                | 7                | 0              | -0.434043               | 0.132859  | 0.235602  |
| 2                | 6                | 0              | -0.397224               | 1.153323  | -0.825629 |
| 3                | 1                | 0              | -1.434093               | 1.319308  | -1.129070 |
| 4                | 8                | 0              | 1.758455                | -1.103811 | 0.375257  |
| 5                | 8                | 0              | 1.169725                | -0.073163 | 0.888208  |
| 6                | 8                | 0              | 2.335793                | -0.826337 | -0.823225 |
| 7                | 6                | 0              | -0.880122               | -1.207964 | -0.166170 |
| 8                | 1                | 0              | -0.217892               | -1.510487 | -0.976655 |
| 9                | 1                | 0              | -0.684132               | -1.862292 | 0.685846  |
| 10               | 6                | 0              | -2.339027               | -1.248726 | -0.572273 |
| 11               | 1                | 0              | -2.607419               | -2.287053 | -0.767035 |
| 12               | 1                | 0              | -2.982725               | -0.874350 | 0.223621  |
| 13               | 1                | 0              | -2.525872               | -0.679520 | -1.482665 |
| 14               | 6                | 0              | 0.248866                | 2.446555  | -0.385955 |
| 15               | 1                | 0              | 0.221724                | 3.140029  | -1.227005 |
| 16               | 1                | 0              | -0.290936               | 2.899501  | 0.444655  |
| 17               | 1                | 0              | 1.287071                | 2.292491  | -0.098362 |
| 18               | 1                | 0              | 0.147955                | 0.689107  | -1.645503 |
| 19               | 8                | 0              | -1.108057               | 0.633434  | 1.306182  |
| 20               | 1                | 0              | -0.917660               | 0.043143  | 2.051733  |

## Standard orientation of Ts-DE-d'

Cartesian coordinates of all the transition states optimized at the LC- $\omega$ PBE /6-311++G(d,p) level:

Standard orientation of transition state of Ts-DE-d'

State=1-A

Charge = 0 Multiplicity = 1

Lowest Harmonic Vibrational Frequency (LHVF) = -425.60 cm<sup>-1</sup>

Standard orientation:

| Center<br>Number | Atomic<br>Number | Atomic<br>Type | Coordinates (Angstroms) |           |           |
|------------------|------------------|----------------|-------------------------|-----------|-----------|
|                  |                  |                | X                       | Y         | Z         |
| 1                | 1                | 0              | -0.164392               | -0.465765 | 1.275348  |
| 2                | 8                | 0              | -2.084877               | -0.747510 | 0.055376  |
| 3                | 8                | 0              | -1.660068               | -0.664519 | -1.127157 |
| 4                | 8                | 0              | -1.307881               | -1.390101 | 0.856452  |
| 5                | 8                | 0              | 0.502470                | 0.282843  | 1.466828  |
| 6                | 7                | 0              | 1.071503                | 0.689088  | 0.315690  |
| 7                | 6                | 0              | 0.203973                | 1.249185  | -0.635280 |
| 8                | 1                | 0              | 0.799340                | 1.620232  | -1.471055 |
| 9                | 1                | 0              | -0.453345               | 0.407579  | -1.091654 |
| 10               | 6                | 0              | 2.200009                | -0.118289 | -0.112826 |
| 11               | 1                | 0              | 2.708095                | 0.444944  | -0.897239 |
| 12               | 1                | 0              | 2.878823                | -0.183166 | 0.739212  |
| 13               | 6                | 0              | -0.754081               | 2.287416  | -0.096227 |
| 14               | 1                | 0              | -1.346067               | 2.692433  | -0.916979 |
| 15               | 1                | 0              | -1.436714               | 1.866887  | 0.643022  |
| 16               | 1                | 0              | -0.203702               | 3.103762  | 0.374463  |
| 17               | 6                | 0              | 1.829419                | -1.511351 | -0.604016 |
| 18               | 1                | 0              | 1.171142                | -1.466954 | -1.472981 |
| 19               | 1                | 0              | 2.738864                | -2.041534 | -0.891046 |
| 20               | 1                | 0              | 1.334363                | -2.089502 | 0.177185  |

## Standard orientation of Ts-DE-e

Cartesian coordinates of all the transition states optimized at the LC- $\omega$ PBE /6-311++G(d,p) level:

Standard orientation of transition state of Ts-DE-e

State=1-A

Charge = 0 Multiplicity = 1

Lowest Harmonic Vibrational Frequency (LHVF) = -674.62 cm<sup>-1</sup>

Standard orientation:

| Center<br>Number | Atomic<br>Number | Atomic<br>Type | Coordinates (Angstroms) |           |           |
|------------------|------------------|----------------|-------------------------|-----------|-----------|
|                  |                  |                | X                       | Y         | Z         |
| 1                | 7                | 0              | -0.601185               | 0.359938  | 0.243998  |
| 2                | 1                | 0              | 2.951801                | -1.663935 | -0.963839 |
| 3                | 6                | 0              | 0.181722                | 0.944498  | -0.850966 |
| 4                | 1                | 0              | 0.980530                | 0.214366  | -1.041667 |
| 5                | 1                | 0              | -0.504960               | 0.906008  | -1.704581 |
| 6                | 8                | 0              | 1.463914                | -0.628406 | 1.341251  |
| 7                | 8                | 0              | 2.011097                | -1.578743 | -0.799476 |
| 8                | 1                | 0              | 2.125082                | 0.009977  | 1.617034  |
| 9                | 1                | 0              | 1.820953                | -1.110513 | 0.327516  |
| 10               | 6                | 0              | -1.041759               | -1.044762 | 0.116262  |
| 11               | 1                | 0              | -1.031809               | -1.436437 | 1.130139  |
| 12               | 1                | 0              | -0.286626               | -1.544727 | -0.488319 |
| 13               | 8                | 0              | -0.983736               | 1.014415  | 1.141642  |
| 14               | 6                | 0              | -2.430103               | -1.080190 | -0.501620 |
| 15               | 1                | 0              | -2.438027               | -0.678993 | -1.515058 |
| 16               | 1                | 0              | -2.741533               | -2.123184 | -0.548847 |
| 17               | 1                | 0              | -3.148711               | -0.535450 | 0.110911  |
| 18               | 6                | 0              | 0.655333                | 2.335601  | -0.541548 |
| 19               | 1                | 0              | 1.303596                | 2.337000  | 0.335480  |
| 20               | 1                | 0              | 1.230117                | 2.694605  | -1.394816 |
| 21               | 1                | 0              | -0.173469               | 3.022702  | -0.372032 |

## Standard orientation of Ts-DE-f

Cartesian coordinates of all the transition states optimized at the LC- $\omega$ PBE /6-311++G(d,p) level:

Standard orientation of transition state of Ts-DE-f

State=1-A

Charge = 0    Multiplicity = 1

Lowest Harmonic Vibrational Frequency (LHVF) = -311.04 cm<sup>-1</sup>

Standard orientation:

| Center<br>Number | Atomic<br>Number | Atomic<br>Type | Coordinates (Angstroms) |           |           |
|------------------|------------------|----------------|-------------------------|-----------|-----------|
|                  |                  |                | X                       | Y         | Z         |
| 1                | 7                | 0              | 0.510174                | 0.104410  | 0.186635  |
| 2                | 8                | 0              | -1.750778               | -0.925201 | 0.306977  |
| 3                | 8                | 0              | -1.932957               | 0.103914  | -0.414766 |
| 4                | 8                | 0              | -1.109010               | -1.837338 | -0.313166 |
| 5                | 6                | 0              | 1.579340                | -0.765078 | -0.353718 |
| 6                | 1                | 0              | 1.487792                | -1.714687 | 0.166623  |
| 7                | 1                | 0              | 1.374767                | -0.918879 | -1.412120 |
| 8                | 8                | 0              | 0.208040                | 0.000841  | 1.398945  |
| 9                | 6                | 0              | -0.128024               | 0.993471  | -0.572697 |
| 10               | 1                | 0              | 0.116985                | 0.934767  | -1.626861 |
| 11               | 6                | 0              | -0.628046               | 2.277520  | -0.014029 |
| 12               | 1                | 0              | -1.454251               | 2.648242  | -0.618891 |
| 13               | 1                | 0              | -0.952460               | 2.162258  | 1.016559  |
| 14               | 1                | 0              | 0.183457                | 3.009250  | -0.061094 |
| 15               | 6                | 0              | 2.930479                | -0.120230 | -0.123726 |
| 16               | 1                | 0              | 3.710355                | -0.780916 | -0.503828 |
| 17               | 1                | 0              | 3.008472                | 0.834935  | -0.645750 |
| 18               | 1                | 0              | 3.108804                | 0.042326  | 0.940017  |

## Standard orientation of Ts-DE-g

Cartesian coordinates of all the transition states optimized at the LC- $\omega$ PBE /6-311++G(d,p) level:

Standard orientation of transition state of Ts-DE-g

State=1-A

Charge = 0 Multiplicity = 1

Lowest Harmonic Vibrational Frequency (LHVF) = -191.97 cm<sup>-1</sup>

Standard orientation:

| Center<br>Number | Atomic<br>Number | Atomic<br>Type | Coordinates (Angstroms) |           |           |
|------------------|------------------|----------------|-------------------------|-----------|-----------|
|                  |                  |                | X                       | Y         | Z         |
| 1                | 7                | 0              | 0.378224                | -0.212184 | 0.225437  |
| 2                | 8                | 0              | -2.068963               | -0.946182 | 0.126244  |
| 3                | 8                | 0              | -1.717439               | 0.781580  | 0.308812  |
| 4                | 8                | 0              | -1.256206               | -1.393878 | -0.725757 |
| 5                | 6                | 0              | 1.514566                | -0.732054 | -0.564952 |
| 6                | 1                | 0              | 1.369654                | -0.381763 | -1.585516 |
| 7                | 8                | 0              | 0.271977                | -0.489738 | 1.372444  |
| 8                | 6                | 0              | -0.575756               | 0.858281  | -0.355949 |
| 9                | 1                | 0              | -0.642768               | 0.542495  | -1.406430 |
| 10               | 6                | 0              | 0.090985                | 2.214148  | -0.219431 |
| 11               | 1                | 0              | -0.582042               | 2.957200  | -0.644493 |
| 12               | 1                | 0              | 0.262077                | 2.447042  | 0.831205  |
| 13               | 1                | 0              | 1.031591                | 2.248614  | -0.768786 |
| 14               | 1                | 0              | 1.417330                | -1.815959 | -0.543293 |
| 15               | 6                | 0              | 2.830130                | -0.274931 | 0.034639  |
| 16               | 1                | 0              | 3.638910                | -0.697103 | -0.561059 |
| 17               | 1                | 0              | 2.928238                | 0.810535  | 0.022007  |
| 18               | 1                | 0              | 2.934935                | -0.632689 | 1.058516  |



## Standard orientation of Ts-DE-h

Cartesian coordinates of all the transition states optimized at the LC- $\omega$ PBE /6-311++G(d,p) level:

Standard orientation of transition state of Ts-DE-h

State=1-A

Charge = 0    Multiplicity = 1

Lowest Harmonic Vibrational Frequency (LHVF) = -207.21 cm<sup>-1</sup>

Standard orientation:

| Center<br>Number | Atomic<br>Number | Atomic<br>Type | Coordinates (Angstroms) |           |           |
|------------------|------------------|----------------|-------------------------|-----------|-----------|
|                  |                  |                | X                       | Y         | Z         |
| 1                | 8                | 0              | -1.777675               | -0.689361 | -0.143288 |
| 2                | 8                | 0              | -1.051473               | 0.045713  | -0.930536 |
| 3                | 8                | 0              | -2.522617               | -0.029632 | 0.637693  |
| 4                | 6                | 0              | 1.838455                | -0.094129 | -0.266419 |
| 5                | 1                | 0              | 1.748171                | -0.115984 | -1.356161 |
| 6                | 1                | 0              | 2.744490                | 0.455900  | -0.004718 |
| 7                | 7                | 0              | 0.683276                | 0.707621  | 0.185520  |
| 8                | 8                | 0              | 0.812453                | 1.883212  | 0.225031  |
| 9                | 6                | 0              | 1.780850                | -1.482835 | 0.324230  |
| 10               | 1                | 0              | 2.618574                | -2.070669 | -0.051106 |
| 11               | 1                | 0              | 1.847424                | -1.450975 | 1.412361  |
| 12               | 1                | 0              | 0.857071                | -1.989299 | 0.042923  |

## Standard orientation of Ts-DE-I

Cartesian coordinates of all the transition states optimized at the LC- $\omega$ PBE /6-311++G(d,p) level:

Standard orientation of transition state of Ts-DE-I

State=1-A

Charge = 0    Multiplicity = 1

Lowest Harmonic Vibrational Frequency (LHVF) = -1780.75 cm<sup>-1</sup>

Standard orientation:

---

| Center<br>Number | Atomic<br>Number | Atomic<br>Type | Coordinates (Angstroms) |           |           |
|------------------|------------------|----------------|-------------------------|-----------|-----------|
|                  |                  |                | X                       | Y         | Z         |
| 1                | 7                | 0              | -0.355459               | 0.099024  | -0.327111 |
| 2                | 8                | 0              | 1.299824                | -1.564114 | -0.434209 |
| 3                | 8                | 0              | 2.018909                | -1.027026 | 0.360499  |
| 4                | 6                | 0              | 0.397853                | 0.909432  | 0.436705  |
| 5                | 1                | 0              | 0.028948                | 1.008826  | 1.459386  |
| 6                | 1                | 0              | 1.371647                | 0.133016  | 0.678347  |
| 7                | 6                | 0              | 1.040774                | 2.109087  | -0.205124 |
| 8                | 1                | 0              | 1.829068                | 2.498561  | 0.435945  |
| 9                | 1                | 0              | 1.469146                | 1.857988  | -1.175927 |
| 10               | 1                | 0              | 0.287720                | 2.886885  | -0.342196 |
| 11               | 6                | 0              | -1.446970               | -0.727538 | 0.178023  |
| 12               | 1                | 0              | -1.425764               | -1.668664 | -0.370473 |
| 13               | 1                | 0              | -1.245079               | -0.932962 | 1.229220  |
| 14               | 6                | 0              | -2.779500               | -0.020913 | -0.003583 |
| 15               | 1                | 0              | -2.976072               | 0.184326  | -1.056659 |
| 16               | 1                | 0              | -3.571431               | -0.669669 | 0.371131  |
| 17               | 1                | 0              | -2.808766               | 0.916624  | 0.552301  |
| 18               | 1                | 0              | -0.294010               | 0.200622  | -1.337743 |

---

## Standard orientation of Ts-DE-m

Cartesian coordinates of all the transition states optimized at the LC- $\omega$ PBE /6-311++G(d,p) level:

Standard orientation of transition state of Ts-DE-m

State=1-A

Charge = 0    Multiplicity = 1

Lowest Harmonic Vibrational Frequency (LHVF) = -609.49 cm<sup>-1</sup>

Standard orientation:

| Center<br>Number | Atomic<br>Number | Atomic<br>Type | Coordinates (Angstroms) |           |           |
|------------------|------------------|----------------|-------------------------|-----------|-----------|
|                  |                  |                | X                       | Y         | Z         |
| 1                | 7                | 0              | -0.303213               | -0.191903 | -0.476368 |
| 2                | 6                | 0              | 0.142410                | 0.951454  | 0.279985  |
| 3                | 1                | 0              | -0.579540               | 1.230979  | 1.052823  |
| 4                | 8                | 0              | 1.355384                | 0.534698  | 0.939063  |
| 5                | 1                | 0              | 1.224169                | 0.473844  | 1.889887  |
| 6                | 6                | 0              | -1.355471               | -1.005804 | 0.134356  |
| 7                | 1                | 0              | -1.368808               | -1.971406 | -0.376068 |
| 8                | 1                | 0              | -1.060772               | -1.208125 | 1.167843  |
| 9                | 1                | 0              | 2.957930                | -1.539280 | -0.196245 |
| 10               | 8                | 0              | 2.007830                | -1.729737 | -0.272365 |
| 11               | 1                | 0              | 1.791602                | -2.015192 | -1.175779 |
| 12               | 1                | 0              | 1.439383                | -0.909586 | -0.014657 |
| 13               | 1                | 0              | -0.540337               | 0.056123  | -1.429148 |
| 14               | 6                | 0              | 0.455635                | 2.127904  | -0.610407 |
| 15               | 1                | 0              | -0.451570               | 2.484371  | -1.100806 |
| 16               | 1                | 0              | 0.877833                | 2.941145  | -0.021203 |
| 17               | 1                | 0              | 1.180584                | 1.837240  | -1.374034 |
| 18               | 6                | 0              | -2.737589               | -0.376399 | 0.088056  |
| 19               | 1                | 0              | -3.470385               | -1.032238 | 0.562152  |
| 20               | 1                | 0              | -2.761643               | 0.583103  | 0.609436  |
| 21               | 1                | 0              | -3.051582               | -0.210278 | -0.945148 |

## Standard orientation of Ts-M-a

Cartesian coordinates of all the transition states optimized at the LC- $\omega$ PBE /6-311++G(d,p) level:

Standard orientation of transition state of Ts-M-a

State=1-A

Charge = 0 Multiplicity = 1

Lowest Harmonic Vibrational Frequency (LHVF) = -1044.35 cm<sup>-1</sup>

Standard orientation:

| Center<br>Number | Atomic<br>Number | Atomic<br>Type | Coordinates (Angstroms) |           |           |
|------------------|------------------|----------------|-------------------------|-----------|-----------|
|                  |                  |                | X                       | Y         | Z         |
| 1                | 7                | 0              | 0.920064                | 0.213625  | 0.517714  |
| 2                | 6                | 0              | 2.116510                | 0.136989  | -0.295689 |
| 3                | 1                | 0              | 2.888001                | 0.786611  | 0.120054  |
| 4                | 8                | 0              | -1.424909               | -0.439624 | 0.210759  |
| 5                | 8                | 0              | -0.272128               | -0.793033 | -0.257206 |
| 6                | 8                | 0              | -1.779229               | 0.779861  | -0.242201 |
| 7                | 1                | 0              | 1.005335                | -0.157075 | 1.458943  |
| 8                | 1                | 0              | 1.873034                | 0.459376  | -1.305727 |
| 9                | 1                | 0              | 0.430471                | 1.106944  | 0.495389  |
| 10               | 1                | 0              | 2.473782                | -0.890803 | -0.309342 |

## Standard orientation of Ts-M-b'

Cartesian coordinates of all the transition states optimized at the LC- $\omega$ PBE /6-311++G(d,p) level:

Standard orientation of transition state of Ts-M-b'

State=1-A

Charge = 0    Multiplicity = 1

Lowest Harmonic Vibrational Frequency (LHVF) = -529.82 cm<sup>-1</sup>

Standard orientation:

| Center<br>Number | Atomic<br>Number | Atomic<br>Type | Coordinates (Angstroms) |           |           |
|------------------|------------------|----------------|-------------------------|-----------|-----------|
|                  |                  |                | X                       | Y         | Z         |
| 1                | 7                | 0              | -1.168044               | -0.440206 | 0.014613  |
| 2                | 8                | 0              | 1.068441                | -0.378280 | 0.461397  |
| 3                | 8                | 0              | 0.149963                | -1.052260 | -0.316782 |
| 4                | 8                | 0              | 1.419707                | 0.791410  | -0.237354 |
| 5                | 6                | 0              | -1.159412               | 0.997556  | 0.061087  |
| 6                | 1                | 0              | 0.442401                | 1.225142  | -0.153065 |
| 7                | 1                | 0              | -1.417413               | -0.873149 | 0.904628  |
| 8                | 1                | 0              | -1.719771               | 1.390854  | -0.782415 |
| 9                | 1                | 0              | -1.536181               | 1.325300  | 1.024803  |
| 10               | 1                | 0              | -1.741142               | -0.858997 | -0.720857 |

## Standard orientation of Ts-M-c

Cartesian coordinates of all the transition states optimized at the LC- $\omega$ PBE /6-311++G(d,p) level:

Standard orientation of transition state of Ts-M-c

State=1-A

Charge = 0    Multiplicity = 1

Lowest Harmonic Vibrational Frequency (LHVF) = -880.71 cm<sup>-1</sup>

Standard orientation:

| Center<br>Number | Atomic<br>Number | Atomic<br>Type | Coordinates (Angstroms) |           |           |
|------------------|------------------|----------------|-------------------------|-----------|-----------|
|                  |                  |                | X                       | Y         | Z         |
| 1                | 7                | 0              | 0.954181                | 0.029624  | -0.455112 |
| 2                | 1                | 0              | 0.118010                | 0.755271  | -0.372711 |
| 3                | 1                | 0              | 1.339079                | 0.084404  | -1.397763 |
| 4                | 6                | 0              | 1.998378                | 0.330814  | 0.530074  |
| 5                | 1                | 0              | 1.549300                | 0.316194  | 1.520478  |
| 6                | 1                | 0              | 2.784105                | -0.418411 | 0.459754  |
| 7                | 8                | 0              | 0.456078                | -1.256901 | -0.284444 |
| 8                | 8                | 0              | -1.177020               | 1.446251  | -0.229072 |
| 9                | 1                | 0              | -1.682398               | 0.415791  | 0.073529  |
| 10               | 1                | 0              | -1.235706               | 2.079361  | 0.489961  |
| 11               | 8                | 0              | -1.926794               | -0.772428 | 0.238669  |
| 12               | 1                | 0              | -0.559086               | -1.140103 | -0.026115 |
| 13               | 1                | 0              | -2.199882               | -0.940757 | 1.143073  |
| 14               | 1                | 0              | 2.398934                | 1.320627  | 0.313915  |

## Standard orientation of Ts-M-d

Cartesian coordinates of all the transition states optimized at the LC- $\omega$ PBE /6-311++G(d,p) level:

Standard orientation of transition state of Ts-M-d

State=1-A

Charge = 0    Multiplicity = 1

Lowest Harmonic Vibrational Frequency (LHVF) = -238.73 cm<sup>-1</sup>

Standard orientation:

| Center<br>Number | Atomic<br>Number | Atomic<br>Type | Coordinates (Angstroms) |           |           |
|------------------|------------------|----------------|-------------------------|-----------|-----------|
|                  |                  |                | X                       | Y         | Z         |
| 1                | 7                | 0              | 0.858993                | 0.116956  | 0.373226  |
| 2                | 8                | 0              | -1.464809               | -0.100615 | -0.518839 |
| 3                | 8                | 0              | -0.506283               | -0.904592 | -0.341365 |
| 4                | 8                | 0              | -2.163595               | 0.126884  | 0.598530  |
| 5                | 6                | 0              | 2.089813                | -0.599551 | 0.109713  |
| 6                | 1                | 0              | 2.021822                | -1.561234 | 0.614983  |
| 7                | 1                | 0              | 2.183941                | -0.760411 | -0.963737 |
| 8                | 1                | 0              | 2.943315                | -0.035731 | 0.488200  |
| 9                | 8                | 0              | 0.734012                | 1.339227  | -0.191208 |
| 10               | 1                | 0              | 0.886554                | 1.231704  | -1.142554 |
| 11               | 1                | 0              | 0.617932                | 0.217049  | 1.355314  |

## Standard orientation of Ts-M-e

Cartesian coordinates of all the transition states optimized at the LC- $\omega$ PBE /6-311++G(d,p) level:

Standard orientation of transition state of Ts-M-e

State=1-A

Charge = 0    Multiplicity = 1

Lowest Harmonic Vibrational Frequency (LHVF) = -763.25 cm<sup>-1</sup>

Standard orientation:

| Center<br>Number | Atomic<br>Number | Atomic<br>Type | Coordinates (Angstroms) |           |           |
|------------------|------------------|----------------|-------------------------|-----------|-----------|
|                  |                  |                | X                       | Y         | Z         |
| 1                | 7                | 0              | -1.129448               | 0.273937  | -0.135242 |
| 2                | 6                | 0              | -1.931272               | -0.263714 | 0.958081  |
| 3                | 1                | 0              | -2.458835               | -1.146527 | 0.606833  |
| 4                | 1                | 0              | -1.277763               | -0.478114 | 1.797353  |
| 5                | 1                | 0              | -2.644312               | 0.521012  | 1.220380  |
| 6                | 8                | 0              | 0.321734                | -1.392662 | -0.181815 |
| 7                | 1                | 0              | 0.168361                | -2.070905 | 0.481672  |
| 8                | 1                | 0              | -0.182865               | 0.837107  | 0.074262  |
| 9                | 8                | 0              | -1.584312               | 0.322468  | -1.228349 |
| 10               | 8                | 0              | 2.514294                | -0.439622 | 0.061914  |
| 11               | 1                | 0              | 3.055244                | -0.565806 | -0.720432 |
| 12               | 1                | 0              | 1.483967                | -0.986662 | -0.071509 |
| 13               | 8                | 0              | 1.049245                | 1.585306  | 0.182493  |
| 14               | 1                | 0              | 1.162806                | 2.093687  | 0.990441  |
| 15               | 1                | 0              | 1.779483                | 0.857014  | 0.145260  |



## Standard orientation of Ts-M-e'

Cartesian coordinates of all the transition states optimized at the LC- $\omega$ PBE /6-311++G(d,p) level:

Standard orientation of transition state of Ts-M-e'

State=1-A

Charge = 0    Multiplicity = 1

Lowest Harmonic Vibrational Frequency (LHVF) = -1113.10 cm<sup>-1</sup>

Standard orientation:

| Center<br>Number | Atomic<br>Number | Atomic<br>Type | Coordinates (Angstroms) |           |           |
|------------------|------------------|----------------|-------------------------|-----------|-----------|
|                  |                  |                | X                       | Y         | Z         |
| 1                | 7                | 0              | -0.739414               | -0.011561 | 0.006599  |
| 2                | 1                | 0              | 0.089652                | 0.781451  | -0.074051 |
| 3                | 6                | 0              | -1.812490               | 0.181801  | -0.970888 |
| 4                | 1                | 0              | -1.367112               | 0.116868  | -1.959998 |
| 5                | 1                | 0              | -2.549101               | -0.606672 | -0.828211 |
| 6                | 1                | 0              | -2.252985               | 1.162642  | -0.809595 |
| 7                | 8                | 0              | -0.177607               | -1.242958 | -0.147405 |
| 8                | 8                | 0              | 1.282380                | 1.476723  | -0.010559 |
| 9                | 1                | 0              | 1.897807                | 0.478407  | -0.036508 |
| 10               | 1                | 0              | 1.468531                | 2.026278  | -0.775760 |
| 11               | 8                | 0              | 2.197363                | -0.723566 | 0.037368  |
| 12               | 1                | 0              | 0.914135                | -1.102494 | -0.071206 |
| 13               | 1                | 0              | 2.721531                | -1.001348 | -0.717414 |
| 14               | 8                | 0              | -1.335530               | 0.107762  | 1.265379  |
| 15               | 1                | 0              | -0.604464               | 0.191293  | 1.893613  |

## Standard orientation of Ts-M-f

Cartesian coordinates of all the transition states optimized at the LC- $\omega$ PBE /6-311++G(d,p) level:

Standard orientation of transition state of Ts-M-f

State=1-A

Charge = 0    Multiplicity = 1

Lowest Harmonic Vibrational Frequency (LHVF) = -212.06 cm<sup>-1</sup>

Standard orientation:

| Center<br>Number | Atomic<br>Number | Atomic<br>Type | Coordinates (Angstroms) |           |           |
|------------------|------------------|----------------|-------------------------|-----------|-----------|
|                  |                  |                | X                       | Y         | Z         |
| 1                | 8                | 0              | -1.620678               | 0.329981  | 0.342321  |
| 2                | 8                | 0              | -0.772888               | -0.575567 | 0.731242  |
| 3                | 8                | 0              | -2.240556               | 0.034124  | -0.720715 |
| 4                | 6                | 0              | 1.607499                | 1.167150  | 0.057651  |
| 5                | 1                | 0              | 0.839076                | 1.697257  | 0.616904  |
| 6                | 1                | 0              | 2.541032                | 1.085767  | 0.612713  |
| 7                | 1                | 0              | 1.761193                | 1.678535  | -0.894607 |
| 8                | 7                | 0              | 1.089468                | -0.162223 | -0.270488 |
| 9                | 8                | 0              | 1.832551                | -1.079650 | -0.201286 |

## Standard orientation of Ts-M-g

Cartesian coordinates of all the transition states optimized at the LC- $\omega$ PBE /6-311++G(d,p) level:

Standard orientation of transition state of Ts-M-g

State=1-A

Charge = 0    Multiplicity = 1

Lowest Harmonic Vibrational Frequency (LHVF) = -219.61 cm<sup>-1</sup>

Standard orientation:

| Center<br>Number | Atomic<br>Number | Atomic<br>Type | Coordinates (Angstroms) |           |           |
|------------------|------------------|----------------|-------------------------|-----------|-----------|
|                  |                  |                | X                       | Y         | Z         |
| 1                | 7                | 0              | -0.786074               | 0.043351  | 0.003016  |
| 2                | 8                | 0              | 1.680405                | -0.564809 | 0.292091  |
| 3                | 8                | 0              | 0.824142                | -1.136103 | -0.401003 |
| 4                | 8                | 0              | 1.920053                | 0.662882  | -0.117929 |
| 5                | 8                | 0              | -0.624144               | 0.588270  | 1.248657  |
| 6                | 1                | 0              | 0.254240                | 1.001718  | 1.244103  |
| 7                | 8                | 0              | -0.760025               | 0.983234  | -0.987316 |
| 8                | 1                | 0              | 0.187361                | 1.065775  | -1.203872 |
| 9                | 6                | 0              | -2.042301               | -0.679021 | -0.033607 |
| 10               | 1                | 0              | -2.101438               | -1.185429 | -0.993466 |
| 11               | 1                | 0              | -2.036111               | -1.401853 | 0.777715  |
| 12               | 1                | 0              | -2.871167               | 0.022663  | 0.080046  |

## Standard orientation of Ts-M-g'

Cartesian coordinates of all the transition states optimized at the LC- $\omega$ PBE /6-311++G(d,p) level:

Standard orientation of transition state of Ts-M-g'

State=1-A

Charge = 0 Multiplicity = 1

Lowest Harmonic Vibrational Frequency (LHVF) = -797.91 cm<sup>-1</sup>

Standard orientation:

| Center<br>Number | Atomic<br>Number | Atomic<br>Type | Coordinates (Angstroms) |           |           |
|------------------|------------------|----------------|-------------------------|-----------|-----------|
|                  |                  |                | X                       | Y         | Z         |
| 1                | 7                | 0              | 0.902909                | 0.164028  | -0.323861 |
| 2                | 6                | 0              | 2.360574                | 0.097087  | -0.331625 |
| 3                | 1                | 0              | 2.708072                | 1.008348  | -0.817726 |
| 4                | 1                | 0              | 2.759145                | 0.056143  | 0.687037  |
| 5                | 1                | 0              | 2.679303                | -0.768000 | -0.909609 |
| 6                | 8                | 0              | 0.496206                | 1.074634  | 0.534150  |
| 7                | 1                | 0              | -0.860923               | 1.299564  | 0.210409  |
| 8                | 8                | 0              | 0.534283                | -1.239792 | 0.308908  |
| 9                | 1                | 0              | 0.671115                | -1.111367 | 1.262475  |
| 10               | 8                | 0              | -1.899237               | 1.251711  | -0.023355 |
| 11               | 1                | 0              | -2.067411               | 1.780423  | -0.807714 |
| 12               | 1                | 0              | -0.676669               | -1.302723 | 0.056462  |
| 13               | 8                | 0              | -1.796202               | -1.194732 | -0.262661 |
| 14               | 1                | 0              | -1.985676               | -0.153168 | -0.204911 |
| 15               | 1                | 0              | -2.391164               | -1.674502 | 0.324017  |

## Standard orientation of Ts-M-h

Cartesian coordinates of all the transition states optimized at the LC- $\omega$ PBE /6-311++G(d,p) level:

Standard orientation of transition state of Ts-M-h

State=1-A

Charge = 0 Multiplicity = 1

Lowest Harmonic Vibrational Frequency (LHVF) = -335.29 cm<sup>-1</sup>

Standard orientation:

| Center<br>Number | Atomic<br>Number | Atomic<br>Type | Coordinates (Angstroms) |           |           |
|------------------|------------------|----------------|-------------------------|-----------|-----------|
|                  |                  |                | X                       | Y         | Z         |
| 1                | 7                | 0              | 1.286127                | 0.085639  | -0.031564 |
| 2                | 8                | 0              | -0.081774               | -1.416921 | -0.338905 |
| 3                | 1                | 0              | 0.116410                | -1.639313 | -1.254130 |
| 4                | 8                | 0              | 0.722896                | 1.034650  | -0.723877 |
| 5                | 1                | 0              | -0.280739               | 1.233277  | -0.389092 |
| 6                | 6                | 0              | 0.996519                | 0.049985  | 1.420575  |
| 7                | 1                | 0              | 1.324366                | -0.917652 | 1.779833  |
| 8                | 1                | 0              | 1.579769                | 0.862862  | 1.853570  |
| 9                | 1                | 0              | -0.065950               | 0.195005  | 1.574937  |
| 10               | 8                | 0              | 2.317580                | -0.345493 | -0.435770 |
| 11               | 8                | 0              | -1.608957               | 1.503636  | -0.138651 |
| 12               | 1                | 0              | -1.820060               | 2.107349  | 0.579815  |
| 13               | 1                | 0              | -1.539639               | -1.203439 | -0.139563 |
| 14               | 8                | 0              | -2.517140               | -0.888360 | -0.001876 |
| 15               | 1                | 0              | -2.840521               | -1.278803 | 0.813597  |
| 16               | 1                | 0              | -2.116471               | 0.641229  | -0.008838 |

## Standard orientation of Ts-M-i

Cartesian coordinates of all the transition states optimized at the LC- $\omega$ PBE /6-311++G(d,p) level:

Standard orientation of transition state of Ts-M-i

State=1-A

Charge = 0 Multiplicity = 1

Lowest Harmonic Vibrational Frequency (LHVF) =  $-155.93\text{cm}^{-1}$

Standard orientation:

| Center<br>Number | Atomic<br>Number | Atomic<br>Type | Coordinates (Angstroms) |           |           |
|------------------|------------------|----------------|-------------------------|-----------|-----------|
|                  |                  |                | X                       | Y         | Z         |
| 1                | 7                | 0              | -0.685087               | 1.474478  | -0.335517 |
| 2                | 6                | 0              | -1.395620               | 0.795527  | 0.482426  |
| 3                | 1                | 0              | -2.472341               | 0.777231  | 0.385793  |
| 4                | 1                | 0              | -0.928328               | 0.409702  | 1.377835  |
| 5                | 8                | 0              | 1.918451                | 0.892331  | -0.020945 |
| 6                | 1                | 0              | 0.358326                | 1.465328  | -0.234446 |
| 7                | 1                | 0              | 2.425384                | 1.112028  | 0.763648  |
| 8                | 8                | 0              | -1.336424               | -1.318743 | -0.236737 |
| 9                | 1                | 0              | -1.765874               | -1.957094 | 0.339367  |
| 10               | 1                | 0              | -0.296970               | -1.455154 | -0.125484 |
| 11               | 1                | 0              | -1.108429               | 1.893986  | -1.152897 |
| 12               | 8                | 0              | 1.130086                | -1.465003 | 0.078472  |
| 13               | 1                | 0              | 1.591538                | -2.078818 | -0.495940 |
| 14               | 1                | 0              | 1.669121                | -0.130396 | 0.029861  |

## Standard orientation of Ts-M-j

Cartesian coordinates of all the transition states optimized at the LC- $\omega$ PBE /6-311++G(d,p) level:

Standard orientation of transition state of Ts-M-j

State=1-A

Charge = 1    Multiplicity = 2

Lowest Harmonic Vibrational Frequency (LHVF) = -1503.05 cm<sup>-1</sup>

Standard orientation:

---

| Center<br>Number | Atomic<br>Number | Atomic<br>Type | Coordinates (Angstroms) |           |           |
|------------------|------------------|----------------|-------------------------|-----------|-----------|
|                  |                  |                | X                       | Y         | Z         |
| 1                | 7                | 0              | 1.054308                | 0.678174  | -0.000139 |
| 2                | 8                | 0              | -1.207291               | 0.591665  | 0.000203  |
| 3                | 8                | 0              | -1.282553               | -0.598512 | -0.000091 |
| 4                | 6                | 0              | 1.208713                | -0.649386 | 0.000039  |
| 5                | 1                | 0              | 1.548602                | -1.089564 | 0.933945  |
| 6                | 1                | 0              | 0.001865                | -1.042398 | 0.000656  |
| 7                | 1                | 0              | 1.547615                | -1.089988 | -0.934025 |
| 8                | 1                | 0              | 1.095148                | 1.213197  | 0.861492  |
| 9                | 1                | 0              | 1.093092                | 1.212623  | -0.862220 |

---

## Standard orientation of Ts-M-k

Cartesian coordinates of all the transition states optimized at the LC- $\omega$ PBE /6-311++G(d,p) level:

Standard orientation of transition state of Ts-M-k

State=1-A

Charge = 1    Multiplicity = 1

Lowest Harmonic Vibrational Frequency (LHVF) = -591.31 cm<sup>-1</sup>

Standard orientation:

| Center<br>Number | Atomic<br>Number | Atomic<br>Type | Coordinates (Angstroms) |           |           |
|------------------|------------------|----------------|-------------------------|-----------|-----------|
|                  |                  |                | X                       | Y         | Z         |
| 1                | 7                | 0              | -0.604132               | 1.131154  | -0.071796 |
| 2                | 6                | 0              | -1.336439               | -0.091851 | 0.114342  |
| 3                | 1                | 0              | -2.120432               | -0.234175 | -0.629968 |
| 4                | 1                | 0              | -1.773996               | -0.122499 | 1.111117  |
| 5                | 8                | 0              | -0.393952               | -1.167207 | 0.027569  |
| 6                | 1                | 0              | -0.556945               | -1.695785 | -0.759195 |
| 7                | 1                | 0              | 2.386234                | -0.646734 | 0.476833  |
| 8                | 8                | 0              | 1.974994                | 0.049554  | -0.062774 |
| 9                | 1                | 0              | 2.239177                | 0.928774  | 0.256508  |
| 10               | 1                | 0              | 0.952515                | -0.033435 | -0.056387 |
| 11               | 1                | 0              | -0.753684               | 1.806222  | 0.665596  |
| 12               | 1                | 0              | -0.773645               | 1.571884  | -0.966343 |



## Standard orientation of Ts-M-1

Cartesian coordinates of all the transition states optimized at the LC- $\omega$ PBE /6-311++G(d,p) level:

Standard orientation of transition state of Ts-M-1

State=1-A

Charge = 0    Multiplicity = 1

Lowest Harmonic Vibrational Frequency (LHVF) = -406.77 cm<sup>-1</sup>

Standard orientation:

| Center<br>Number | Atomic<br>Number | Atomic<br>Type | Coordinates (Angstroms) |           |           |
|------------------|------------------|----------------|-------------------------|-----------|-----------|
|                  |                  |                | X                       | Y         | Z         |
| 1                | 7                | 0              | 1.189981                | 1.052679  | -0.149922 |
| 2                | 1                | 0              | 1.694062                | 1.758282  | 0.385023  |
| 3                | 1                | 0              | 1.518764                | 1.091444  | -1.113045 |
| 4                | 6                | 0              | 1.413719                | -0.324599 | 0.404292  |
| 5                | 1                | 0              | 1.008036                | -0.306847 | 1.420612  |
| 6                | 1                | 0              | -0.192310               | -1.269959 | -0.203063 |
| 7                | 1                | 0              | 2.490897                | -0.488672 | 0.444217  |
| 8                | 8                | 0              | 0.819562                | -1.256417 | -0.401277 |
| 9                | 8                | 0              | -1.631809               | -1.071553 | 0.172925  |
| 10               | 1                | 0              | -1.620788               | 0.221493  | 0.093113  |
| 11               | 1                | 0              | -2.243639               | -1.457996 | -0.456518 |
| 12               | 8                | 0              | -1.398981               | 1.329133  | 0.078586  |
| 13               | 1                | 0              | 0.125434                | 1.278426  | -0.123050 |
| 14               | 1                | 0              | -1.902811               | 1.743358  | -0.625466 |

## Standard orientation of Ts-M-I'

Cartesian coordinates of all the transition states optimized at the LC- $\omega$ PBE /6-311++G(d,p) level:

Standard orientation of transition state of Ts-M-I'

State=1-A

Charge = 0    Multiplicity = 1

Lowest Harmonic Vibrational Frequency (LHVF) =  $-415.89\text{cm}^{-1}$

Standard orientation:

| Center<br>Number | Atomic<br>Number | Atomic<br>Type | Coordinates (Angstroms) |           |           |
|------------------|------------------|----------------|-------------------------|-----------|-----------|
|                  |                  |                | X                       | Y         | Z         |
| 1                | 7                | 0              | 0.498586                | -0.623786 | 0.623149  |
| 2                | 6                | 0              | 1.775726                | -0.397205 | -0.048060 |
| 3                | 8                | 0              | -1.881280               | -0.309465 | -0.110503 |
| 4                | 8                | 0              | -0.763646               | -0.548272 | -0.658810 |
| 5                | 8                | 0              | -2.001921               | 0.971989  | 0.264610  |
| 6                | 1                | 0              | 2.575103                | -0.825594 | 0.562521  |
| 7                | 8                | 0              | 1.961524                | 0.955383  | -0.293909 |
| 8                | 1                | 0              | 2.402274                | 1.366273  | 0.455632  |
| 9                | 1                | 0              | 1.736352                | -0.921661 | -1.004482 |
| 10               | 1                | 0              | 0.392561                | -1.545596 | 1.036930  |
| 11               | 1                | 0              | 0.231839                | 0.119228  | 1.264613  |

## Standard orientation of Ts-M-I''

Cartesian coordinates of all the transition states optimized at the LC- $\omega$ PBE /6-311++G(d,p) level:

Standard orientation of transition state of Ts-M-I''

State=1-A

Charge = 0    Multiplicity = 1

Lowest Harmonic Vibrational Frequency (LHVF) = -152.46 cm<sup>-1</sup>

Standard orientation:

| Center<br>Number | Atomic<br>Number | Atomic<br>Type | Coordinates (Angstroms) |           |           |
|------------------|------------------|----------------|-------------------------|-----------|-----------|
|                  |                  |                | X                       | Y         | Z         |
| 1                | 1                | 0              | -2.472157               | -1.022540 | 0.734117  |
| 2                | 1                | 0              | -0.413601               | -1.448775 | -0.219423 |
| 3                | 8                | 0              | 1.392382                | 1.263457  | -0.273516 |
| 4                | 8                | 0              | -1.958047               | -0.823883 | -0.051516 |
| 5                | 1                | 0              | 1.851909                | 1.908888  | 0.270560  |
| 6                | 1                | 0              | -1.670429               | 0.188179  | -0.001913 |
| 7                | 1                | 0              | 2.432112                | -0.861784 | 0.438520  |
| 8                | 8                | 0              | -1.081308               | 1.507095  | -0.048427 |
| 9                | 1                | 0              | 0.361291                | 1.442971  | -0.160778 |
| 10               | 1                | 0              | -1.388380               | 2.093303  | 0.645575  |
| 11               | 6                | 0              | 1.353862                | -0.831497 | 0.513607  |
| 12               | 1                | 0              | 0.885211                | -0.396097 | 1.385202  |
| 13               | 7                | 0              | 0.630729                | -1.503234 | -0.298832 |
| 14               | 1                | 0              | 1.051557                | -1.965877 | -1.094002 |

## Standard orientation of Ts-M-m

Cartesian coordinates of all the transition states optimized at the LC- $\omega$ PBE/6-311+G(d) level:

Standard orientation of transition state of Ts-M-m

State=1-A

Charge = 0    Multiplicity = 1

Lowest Harmonic Vibrational Frequency (LHVF) = -1042.85 cm<sup>-1</sup>

Standard orientation:

| Center<br>Number | Atomic<br>Number | Atomic<br>Type | Coordinates (Angstroms) |           |           |
|------------------|------------------|----------------|-------------------------|-----------|-----------|
|                  |                  |                | X                       | Y         | Z         |
| 1                | 7                | 0              | -0.761209               | 0.605357  | 0.000028  |
| 2                | 1                | 0              | -1.122781               | 1.077281  | 0.825619  |
| 3                | 8                | 0              | -1.138200               | -0.705565 | -0.000027 |
| 4                | 6                | 0              | 0.851386                | 0.598782  | -0.000031 |
| 5                | 1                | 0              | 1.130203                | 1.157372  | -0.900627 |
| 6                | 1                | 0              | 1.130275                | 1.157470  | 0.900480  |
| 7                | 8                | 0              | 1.168152                | -0.694737 | 0.000028  |
| 8                | 1                | 0              | -0.034322               | -1.097259 | -0.000003 |
| 9                | 1                | 0              | -1.122842               | 1.077363  | -0.825488 |

## Standard orientation of Ts-M-n

Cartesian coordinates of all the transition states optimized at the LC- $\omega$ PBE/6-311++G(d,p) level:

Standard orientation of transition state of Ts-M-n

State=1-A

Charge = 0    Multiplicity = 1

Lowest Harmonic Vibrational Frequency (LHVF) = -802.76 cm<sup>-1</sup>

Standard orientation:

---

| Center<br>Number | Atomic<br>Number | Atomic<br>Type | Coordinates (Angstroms) |           |           |
|------------------|------------------|----------------|-------------------------|-----------|-----------|
|                  |                  |                | X                       | Y         | Z         |
| 1                | 8                | 0              | 1.169907                | -0.344115 | 0.338201  |
| 2                | 8                | 0              | 0.235972                | -0.904928 | -0.427293 |
| 3                | 8                | 0              | 1.525657                | 0.789473  | -0.077571 |
| 4                | 7                | 0              | -1.396627               | 0.930907  | 0.041891  |
| 5                | 6                | 0              | -1.458990               | -0.371020 | 0.209579  |
| 6                | 1                | 0              | -1.950962               | -1.024111 | -0.511321 |
| 7                | 1                | 0              | -1.359341               | -0.753884 | 1.222327  |
| 8                | 1                | 0              | -1.611661               | 1.164332  | -0.928406 |

---

## Standard orientation of Ts-M-n'

Cartesian coordinates of all the transition states optimized at the LC- $\omega$ PBE/6-311++G(d,p) level:

Standard orientation of transition state of Ts-M-n'

State=1-A

Charge = 0    Multiplicity = 1

Lowest Harmonic Vibrational Frequency (LHVF) = -464.19 cm<sup>-1</sup>

Standard orientation:

| Center<br>Number | Atomic<br>Number | Atomic<br>Type | Coordinates (Angstroms) |           |           |
|------------------|------------------|----------------|-------------------------|-----------|-----------|
|                  |                  |                | X                       | Y         | Z         |
| 1                | 7                | 0              | -1.207582               | 0.753737  | 0.041450  |
| 2                | 8                | 0              | 1.151972                | -0.088904 | 0.331103  |
| 3                | 8                | 0              | 0.610468                | -1.050138 | -0.335428 |
| 4                | 8                | 0              | 0.777946                | 1.027744  | -0.108904 |
| 5                | 6                | 0              | -1.271410               | -0.545641 | 0.166808  |
| 6                | 1                | 0              | -1.210430               | -0.971445 | 1.164505  |
| 7                | 1                | 0              | -1.684327               | -1.172110 | -0.621796 |
| 8                | 1                | 0              | -1.346798               | 1.031633  | -0.927871 |

## Standard orientation of Ts-M-n''

Cartesian coordinates of all the transition states optimized at the LC- $\omega$ PBE/6-311++G(d,p) level:

Standard orientation of transition state of Ts-M-n''

State=1-A

Charge = 0    Multiplicity = 1

Lowest Harmonic Vibrational Frequency (LHVF) = -707.32 cm<sup>-1</sup>

Standard orientation:

| Center<br>Number | Atomic<br>Number | Atomic<br>Type | Coordinates (Angstroms) |           |           |
|------------------|------------------|----------------|-------------------------|-----------|-----------|
|                  |                  |                | X                       | Y         | Z         |
| 1                | 8                | 0              | -1.361117               | -0.407789 | 0.094895  |
| 2                | 8                | 0              | -0.120705               | -0.665702 | -0.512743 |
| 3                | 8                | 0              | -1.643840               | 0.816196  | 0.072224  |
| 4                | 7                | 0              | 1.000823                | -0.148225 | 0.490579  |
| 5                | 6                | 0              | 1.994163                | 0.449527  | -0.143171 |
| 6                | 1                | 0              | 3.009057                | 0.080843  | -0.046262 |
| 7                | 1                | 0              | 1.768639                | 1.303916  | -0.768973 |
| 8                | 1                | 0              | 1.256854                | -0.985979 | 1.005195  |

## Standard orientation of Ts-M-o

Cartesian coordinates of all the transition states optimized at the LC- $\omega$ PBE/6-311++G(d,p) level:

Standard orientation of transition state of Ts-M-o

State=1-A

Charge = 0 Multiplicity = 1

Lowest Harmonic Vibrational Frequency (LHVF) = -656.58 cm<sup>-1</sup>

Standard orientation:

| Center<br>Number | Atomic<br>Number | Atomic<br>Type | Coordinates (Angstroms) |           |           |
|------------------|------------------|----------------|-------------------------|-----------|-----------|
|                  |                  |                | X                       | Y         | Z         |
| 1                | 8                | 0              | -1.106117               | -0.213633 | 0.417830  |
| 2                | 8                | 0              | 0.053312                | 0.656198  | -0.444794 |
| 3                | 8                | 0              | -2.148534               | -0.201020 | -0.163772 |
| 4                | 7                | 0              | 1.971705                | -0.728469 | -0.087247 |
| 5                | 6                | 0              | 1.241740                | 0.438963  | 0.255720  |
| 6                | 1                | 0              | 1.866360                | 1.325059  | 0.066534  |
| 7                | 1                | 0              | 1.049752                | 0.439661  | 1.339702  |
| 8                | 1                | 0              | 1.442231                | -1.231580 | -0.803946 |



## Standard orientation of Ts-M-p

Cartesian coordinates of all the transition states optimized at the LC- $\omega$ PBE/6-311++G(d,p) level:

Standard orientation of transition state of Ts-M-p

State=1-A

Charge = 0    Multiplicity = 1

Lowest Harmonic Vibrational Frequency (LHVF) = -1167.96 cm<sup>-1</sup>

Standard orientation:

| Center<br>Number | Atomic<br>Number | Atomic<br>Type | Coordinates (Angstroms) |           |           |
|------------------|------------------|----------------|-------------------------|-----------|-----------|
|                  |                  |                | X                       | Y         | Z         |
| 1                | 7                | 0              | -0.624456               | 1.153816  | -0.005994 |
| 2                | 8                | 0              | 1.132595                | -0.600521 | 0.212262  |
| 3                | 8                | 0              | -0.548165               | -1.101512 | -0.380948 |
| 4                | 8                | 0              | 1.213423                | 0.612789  | -0.076415 |
| 5                | 6                | 0              | -1.046208               | -0.122617 | 0.309332  |
| 6                | 1                | 0              | -1.314515               | -0.277495 | 1.356803  |
| 7                | 1                | 0              | -1.959965               | 0.446492  | -0.193693 |
| 8                | 1                | 0              | -0.459897               | 1.203944  | -1.016341 |

## Standard orientation of Ts-M-p'

Cartesian coordinates of all the transition states optimized at the LC- $\omega$ PBE/6-311++G(d,p) level:

Standard orientation of transition state of Ts-M-p'

State=1-A

Charge = 0    Multiplicity = 3

Lowest Harmonic Vibrational Frequency (LHVF) = -180.77 cm<sup>-1</sup>

Standard orientation:

| Center<br>Number | Atomic<br>Number | Atomic<br>Type | Coordinates (Angstroms) |           |           |
|------------------|------------------|----------------|-------------------------|-----------|-----------|
|                  |                  |                | X                       | Y         | Z         |
| 1                | 7                | 0              | 1.065849                | -0.121751 | -0.285778 |
| 2                | 8                | 0              | -1.371908               | -0.506482 | 0.071326  |
| 3                | 8                | 0              | -1.168264               | 0.690530  | -0.201681 |
| 4                | 8                | 0              | 0.605566                | -1.195030 | 0.179847  |
| 5                | 6                | 0              | 0.819547                | 1.022708  | 0.289552  |
| 6                | 1                | 0              | 0.554969                | 1.014424  | 1.336381  |
| 7                | 1                | 0              | 1.138024                | 1.922514  | -0.218412 |
| 8                | 1                | 0              | 1.405628                | -0.133074 | -1.250762 |

## Standard orientation of Ts-M-q

Cartesian coordinates of all the transition states optimized at the LC- $\omega$ PBE/6-311++G(d,p) level:

Standard orientation of transition state of Ts-M-q

State=1-A

Charge = 0 Multiplicity = 1

Lowest Harmonic Vibrational Frequency (LHVF) = -1301.06 cm<sup>-1</sup>

Standard orientation:

| Center<br>Number | Atomic<br>Number | Atomic<br>Type | Coordinates (Angstroms) |           |           |
|------------------|------------------|----------------|-------------------------|-----------|-----------|
|                  |                  |                | X                       | Y         | Z         |
| 1                | 1                | 0              | 0.097678                | 0.861425  | -0.016346 |
| 2                | 8                | 0              | 0.507956                | -1.199855 | -0.010242 |
| 3                | 8                | 0              | -1.078166               | 1.471669  | -0.100954 |
| 4                | 1                | 0              | -1.638933               | 0.442924  | -0.043868 |
| 5                | 1                | 0              | -1.285164               | 2.022776  | 0.658370  |
| 6                | 8                | 0              | -1.874646               | -0.777538 | -0.074195 |
| 7                | 1                | 0              | -0.611446               | -1.111382 | -0.017647 |
| 8                | 1                | 0              | -2.362253               | -1.062652 | 0.702179  |
| 9                | 7                | 0              | 0.960286                | 0.051175  | -0.000581 |
| 10               | 6                | 0              | 2.201578                | 0.289296  | 0.023152  |
| 11               | 1                | 0              | 2.914972                | -0.526993 | 0.037705  |
| 12               | 1                | 0              | 2.512528                | 1.325695  | 0.027885  |

## Standard orientation of Ts-E-a

Cartesian coordinates of all the transition states optimized at the LC- $\omega$ PBE/6-311++G(d,p) level:

Standard orientation of transition state of Ts-E-a

State=1-A

Charge = 0    Multiplicity = 1

Lowest Harmonic Vibrational Frequency (LHVF) = -1034.22 cm<sup>-1</sup>

Standard orientation:

---

| Center<br>Number | Atomic<br>Number | Atomic<br>Type | Coordinates (Angstroms) |           |           |
|------------------|------------------|----------------|-------------------------|-----------|-----------|
|                  |                  |                | X                       | Y         | Z         |
| 1                | 7                | 0              | -0.346092               | -0.549340 | 0.506612  |
| 2                | 6                | 0              | -1.568089               | -0.667027 | -0.275820 |
| 3                | 1                | 0              | -2.052909               | -1.606555 | 0.001894  |
| 4                | 8                | 0              | 1.812144                | 0.578408  | 0.231861  |
| 5                | 8                | 0              | 0.603857                | 0.730320  | -0.205508 |
| 6                | 8                | 0              | 2.383899                | -0.522277 | -0.296930 |
| 7                | 1                | 0              | -0.470883               | -0.278799 | 1.478301  |
| 8                | 6                | 0              | -2.486448               | 0.513220  | -0.049122 |
| 9                | 1                | 0              | -3.385476               | 0.393834  | -0.653483 |
| 10               | 1                | 0              | -2.791272               | 0.579867  | 0.997223  |
| 11               | 1                | 0              | -2.004250               | 1.448694  | -0.334071 |
| 12               | 1                | 0              | -1.263445               | -0.745854 | -1.320374 |
| 13               | 1                | 0              | 0.318904                | -1.314572 | 0.398506  |

---

## Standard orientation of Ts-E-b'

Cartesian coordinates of all the transition states optimized at the LC- $\omega$ PBE/6-311++G(d,p) level:

Standard orientation of transition state of Ts-E-b'

State=1-A

Charge = 0 Multiplicity = 1

Lowest Harmonic Vibrational Frequency (LHVF) = -793.14 cm<sup>-1</sup>

Standard orientation:

| Center<br>Number | Atomic<br>Number | Atomic<br>Type | Coordinates (Angstroms) |           |           |
|------------------|------------------|----------------|-------------------------|-----------|-----------|
|                  |                  |                | X                       | Y         | Z         |
| 1                | 7                | 0              | -0.347729               | 1.119829  | 0.158429  |
| 2                | 8                | 0              | 1.276436                | -0.295749 | -0.650181 |
| 3                | 8                | 0              | 1.141822                | 0.956571  | -0.101894 |
| 4                | 8                | 0              | 1.311869                | -1.211948 | 0.422945  |
| 5                | 6                | 0              | -1.014462               | -0.068944 | 0.589127  |
| 6                | 1                | 0              | 0.278496                | -1.023200 | 0.686265  |
| 7                | 1                | 0              | -0.683489               | 1.496576  | -0.730750 |
| 8                | 1                | 0              | -1.385910               | 0.097351  | 1.597989  |
| 9                | 6                | 0              | -2.044548               | -0.555437 | -0.404533 |
| 10               | 1                | 0              | -1.587377               | -0.815123 | -1.363287 |
| 11               | 1                | 0              | -2.503897               | -1.468581 | -0.022165 |
| 12               | 1                | 0              | -2.857460               | 0.156714  | -0.598460 |
| 13               | 1                | 0              | -0.313210               | 1.872752  | 0.846890  |

## Standard orientation of Ts-E-c

Cartesian coordinates of all the transition states optimized at the LC- $\omega$ PBE/6-311++G(d,p) level:

Standard orientation of transition state of Ts-E-c

State=1-A

Charge = 0 Multiplicity = 1

Lowest Harmonic Vibrational Frequency (LHVF) = -875.69 cm<sup>-1</sup>

Standard orientation:

| Center<br>Number | Atomic<br>Number | Atomic<br>Type | Coordinates (Angstroms) |           |           |
|------------------|------------------|----------------|-------------------------|-----------|-----------|
|                  |                  |                | X                       | Y         | Z         |
| 1                | 7                | 0              | 0.429410                | -0.433774 | -0.517799 |
| 2                | 1                | 0              | -0.115266               | 0.530574  | -0.472572 |
| 3                | 1                | 0              | 0.815235                | -0.549105 | -1.455404 |
| 4                | 6                | 0              | 1.518400                | -0.457198 | 0.478807  |
| 5                | 1                | 0              | 1.051358                | -0.281374 | 1.447823  |
| 6                | 1                | 0              | 1.939229                | -1.462566 | 0.472183  |
| 7                | 8                | 0              | -0.472651               | -1.470018 | -0.313615 |
| 8                | 8                | 0              | -1.118364               | 1.613274  | -0.331180 |
| 9                | 1                | 0              | -1.902847               | 0.822332  | 0.092282  |
| 10               | 1                | 0              | -0.923172               | 2.287028  | 0.323904  |
| 11               | 8                | 0              | -2.501242               | -0.201710 | 0.373982  |
| 12               | 1                | 0              | -1.360148               | -1.015151 | 0.022077  |
| 13               | 1                | 0              | -2.714670               | -0.222169 | 1.309368  |
| 14               | 6                | 0              | 2.556999                | 0.593999  | 0.154912  |
| 15               | 1                | 0              | 3.338786                | 0.568745  | 0.913644  |
| 16               | 1                | 0              | 3.025960                | 0.408803  | -0.813525 |
| 17               | 1                | 0              | 2.125336                | 1.596135  | 0.149000  |

## Standard orientation of Ts-E-d

Cartesian coordinates of all the transition states optimized at the LC- $\omega$ PBE/6-311++G(d,p) level:

Standard orientation of transition state of Ts-E-d

State=1-A

Charge = 0 Multiplicity = 1

Lowest Harmonic Vibrational Frequency (LHVF) = -934.75 cm<sup>-1</sup>

Standard orientation:

| Center<br>Number | Atomic<br>Number | Atomic<br>Type | Coordinates (Angstroms) |           |           |
|------------------|------------------|----------------|-------------------------|-----------|-----------|
|                  |                  |                | X                       | Y         | Z         |
| 1                | 7                | 0              | 0.344703                | 0.401460  | 0.198930  |
| 2                | 8                | 0              | -1.832175               | -0.482172 | -0.467009 |
| 3                | 8                | 0              | -1.192953               | 0.635232  | -0.611183 |
| 4                | 8                | 0              | -2.173356               | -0.667592 | 0.829669  |
| 5                | 6                | 0              | 1.154680                | -0.543080 | -0.559910 |
| 6                | 1                | 0              | 0.491874                | -1.385966 | -0.764557 |
| 7                | 1                | 0              | 1.397728                | -0.062400 | -1.509553 |
| 8                | 6                | 0              | 2.391811                | -0.970478 | 0.202890  |
| 9                | 1                | 0              | 2.950793                | -1.682576 | -0.404123 |
| 10               | 1                | 0              | 3.038217                | -0.118485 | 0.413950  |
| 11               | 1                | 0              | 2.128110                | -1.458098 | 1.142414  |
| 12               | 8                | 0              | 0.852968                | 1.631473  | 0.404553  |
| 13               | 1                | 0              | 1.092510                | 1.990119  | -0.463952 |
| 14               | 1                | 0              | -0.026969               | 0.053008  | 1.087190  |

## Standard orientation of Ts-E-e

Cartesian coordinates of all the transition states optimized at the LC- $\omega$ PBE/6-311++G(d,p) level:

Standard orientation of transition state of Ts-E-e

State=1-A

Charge = 0    Multiplicity = 1

Lowest Harmonic Vibrational Frequency (LHVF) = -687.85 cm<sup>-1</sup>

Standard orientation:

---

| Center<br>Number | Atomic<br>Number | Atomic<br>Type | Coordinates (Angstroms) |           |           |
|------------------|------------------|----------------|-------------------------|-----------|-----------|
|                  |                  |                | X                       | Y         | Z         |
| 1                | 7                | 0              | -0.629100               | -0.603522 | 0.205296  |
| 2                | 6                | 0              | -1.601167               | -0.203082 | -0.818730 |
| 3                | 1                | 0              | -1.030897               | 0.306798  | -1.591217 |
| 4                | 1                | 0              | -1.940185               | -1.161826 | -1.228194 |
| 5                | 8                | 0              | 0.490432                | 1.325782  | 0.295238  |
| 6                | 1                | 0              | 0.180984                | 2.025120  | -0.286432 |
| 7                | 1                | 0              | 0.383352                | -0.944566 | -0.100214 |
| 8                | 8                | 0              | -0.972008               | -0.791067 | 1.322362  |
| 9                | 8                | 0              | 2.809329                | 0.831053  | -0.112864 |
| 10               | 1                | 0              | 3.353824                | 1.010992  | 0.656404  |
| 11               | 1                | 0              | 1.713259                | 1.153279  | 0.101271  |
| 12               | 8                | 0              | 1.752245                | -1.441836 | -0.333895 |
| 13               | 1                | 0              | 1.915460                | -1.856107 | -1.185797 |
| 14               | 1                | 0              | 2.327211                | -0.594585 | -0.269831 |
| 15               | 6                | 0              | -2.740856               | 0.610007  | -0.263078 |
| 16               | 1                | 0              | -3.408125               | 0.879220  | -1.081283 |
| 17               | 1                | 0              | -3.312334               | 0.048537  | 0.474760  |
| 18               | 1                | 0              | -2.366707               | 1.524772  | 0.197578  |

---



## Standard orientation of Ts-E-e'

Cartesian coordinates of all the transition states optimized at the LC- $\omega$ PBE/6-311++G(d,p) level:

Standard orientation of transition state of Ts-E-e'

State=1-A

Charge = 0    Multiplicity = 1

Lowest Harmonic Vibrational Frequency (LHVF) = -1086.97 cm<sup>-1</sup>

Standard orientation:

| Center<br>Number | Atomic<br>Number | Atomic<br>Type | Coordinates (Angstroms) |           |           |
|------------------|------------------|----------------|-------------------------|-----------|-----------|
|                  |                  |                | X                       | Y         | Z         |
| 1                | 7                | 0              | 0.430819                | 0.505754  | -0.025723 |
| 2                | 1                | 0              | -0.304300               | 0.131521  | 0.764360  |
| 3                | 6                | 0              | 1.793740                | -0.042679 | 0.130910  |
| 4                | 1                | 0              | 2.395214                | 0.410094  | -0.658419 |
| 5                | 1                | 0              | 2.147273                | 0.311988  | 1.098349  |
| 6                | 8                | 0              | -0.066883               | 0.213928  | -1.258177 |
| 7                | 8                | 0              | -1.471704               | -0.174974 | 1.471255  |
| 8                | 1                | 0              | -2.040934               | -0.425883 | 0.470618  |
| 9                | 1                | 0              | -1.419627               | -0.936359 | 2.053787  |
| 10               | 8                | 0              | -2.347201               | -0.477139 | -0.724487 |
| 11               | 1                | 0              | -1.105700               | -0.109959 | -1.111079 |
| 12               | 1                | 0              | -2.558443               | -1.375157 | -0.990163 |
| 13               | 8                | 0              | 0.552655                | 1.887411  | 0.142020  |
| 14               | 1                | 0              | -0.345510               | 2.210340  | 0.302024  |
| 15               | 6                | 0              | 1.786484                | -1.550314 | 0.052167  |
| 16               | 1                | 0              | 1.428950                | -1.891652 | -0.918388 |
| 17               | 1                | 0              | 2.805594                | -1.911561 | 0.190908  |
| 18               | 1                | 0              | 1.165465                | -1.989495 | 0.834720  |

## Standard orientation of Ts-E-f

Cartesian coordinates of all the transition states optimized at the LC- $\omega$ PBE/6-311++G(d,p) level:

Standard orientation of transition state of Ts-E-f

State=1-A

Charge = 0    Multiplicity = 1

Lowest Harmonic Vibrational Frequency (LHVF) = -207.21 cm<sup>-1</sup>

Standard orientation:

| Center<br>Number | Atomic<br>Number | Atomic<br>Type | Coordinates (Angstroms) |           |           |
|------------------|------------------|----------------|-------------------------|-----------|-----------|
|                  |                  |                | X                       | Y         | Z         |
| 1                | 8                | 0              | -1.777675               | -0.689361 | -0.143288 |
| 2                | 8                | 0              | -1.051473               | 0.045713  | -0.930536 |
| 3                | 8                | 0              | -2.522617               | -0.029632 | 0.637693  |
| 4                | 6                | 0              | 1.838455                | -0.094129 | -0.266419 |
| 5                | 1                | 0              | 1.748171                | -0.115984 | -1.356161 |
| 6                | 1                | 0              | 2.744490                | 0.455900  | -0.004718 |
| 7                | 7                | 0              | 0.683276                | 0.707621  | 0.185520  |
| 8                | 8                | 0              | 0.812453                | 1.883212  | 0.225031  |
| 9                | 6                | 0              | 1.780850                | -1.482835 | 0.324230  |
| 10               | 1                | 0              | 2.618574                | -2.070669 | -0.051106 |
| 11               | 1                | 0              | 1.847424                | -1.450975 | 1.412361  |
| 12               | 1                | 0              | 0.857071                | -1.989299 | 0.042923  |

## Standard orientation of Ts-E-g

Cartesian coordinates of all the transition states optimized at the LC- $\omega$ PBE/6-311++G(d,p) level:

Standard orientation of transition state of Ts-E-g

State=1-A

Charge = 0    Multiplicity = 1

Lowest Harmonic Vibrational Frequency (LHVF) = -210.00 cm<sup>-1</sup>

Standard orientation:

| Center<br>Number | Atomic<br>Number | Atomic<br>Type | Coordinates (Angstroms) |           |           |
|------------------|------------------|----------------|-------------------------|-----------|-----------|
|                  |                  |                | X                       | Y         | Z         |
| 1                | 7                | 0              | -0.376931               | 0.008342  | -0.018272 |
| 2                | 8                | 0              | 2.121867                | -0.509066 | 0.328397  |
| 3                | 8                | 0              | 1.305480                | -1.134824 | -0.362631 |
| 4                | 8                | 0              | 2.322875                | 0.710477  | -0.108249 |
| 5                | 8                | 0              | -0.272859               | 0.594459  | 1.217400  |
| 6                | 1                | 0              | 0.593841                | 1.029059  | 1.230955  |
| 7                | 8                | 0              | -0.367757               | 0.927846  | -1.030941 |
| 8                | 1                | 0              | 0.577151                | 1.021285  | -1.248047 |
| 9                | 6                | 0              | -1.596164               | -0.794312 | -0.066908 |
| 10               | 1                | 0              | -1.543762               | -1.335705 | -1.011054 |
| 11               | 1                | 0              | -1.503913               | -1.512438 | 0.747101  |
| 12               | 6                | 0              | -2.867366               | 0.024154  | 0.042203  |
| 13               | 1                | 0              | -3.722071               | -0.651275 | -0.004833 |
| 14               | 1                | 0              | -2.909067               | 0.563615  | 0.988353  |
| 15               | 1                | 0              | -2.949326               | 0.736870  | -0.778150 |

## Standard orientation of Ts-E-g'

Cartesian coordinates of all the transition states optimized at the LC- $\omega$ PBE/6-311++G(d,p) level:

Standard orientation of transition state of Ts-E-g'

State=1-A

Charge = 0    Multiplicity = 1

Lowest Harmonic Vibrational Frequency (LHVF) = -805.42 cm<sup>-1</sup>

Standard orientation:

| Center<br>Number | Atomic<br>Number | Atomic<br>Type | Coordinates (Angstroms) |           |           |
|------------------|------------------|----------------|-------------------------|-----------|-----------|
|                  |                  |                | X                       | Y         | Z         |
| 1                | 7                | 0              | 0.515127                | -0.124539 | -0.120838 |
| 2                | 6                | 0              | 1.918537                | -0.534469 | 0.013367  |
| 3                | 1                | 0              | 2.125328                | -0.772422 | 1.063866  |
| 4                | 1                | 0              | 2.050020                | -1.431506 | -0.591395 |
| 5                | 8                | 0              | 0.203707                | 0.750743  | 0.809949  |
| 6                | 1                | 0              | -1.003888               | 1.328299  | 0.375689  |
| 7                | 8                | 0              | -0.233151               | -1.464213 | 0.264645  |
| 8                | 1                | 0              | -0.196580               | -1.483078 | 1.235470  |
| 9                | 8                | 0              | -1.986082               | 1.558107  | 0.025353  |
| 10               | 1                | 0              | -1.921896               | 2.190373  | -0.695152 |
| 11               | 1                | 0              | -1.383045               | -1.207377 | -0.113903 |
| 12               | 8                | 0              | -2.399763               | -0.802380 | -0.527583 |
| 13               | 1                | 0              | -2.357748               | 0.242865  | -0.350519 |
| 14               | 1                | 0              | -3.157817               | -1.186829 | -0.073852 |
| 15               | 6                | 0              | 2.817098                | 0.581178  | -0.476691 |
| 16               | 1                | 0              | 2.702178                | 1.473884  | 0.138166  |
| 17               | 1                | 0              | 3.859017                | 0.260934  | -0.428835 |
| 18               | 1                | 0              | 2.587040                | 0.838317  | -1.512639 |

## Standard orientation of Ts-E-h

Cartesian coordinates of all the transition states optimized at the LC- $\omega$ PBE/6-311++G(d,p) level:

Standard orientation of transition state of Ts-E-h

State=1-A

Charge = 0    Multiplicity = 1

Lowest Harmonic Vibrational Frequency (LHVF) = -315.42 cm<sup>-1</sup>

Standard orientation:

| Center<br>Number | Atomic<br>Number | Atomic<br>Type | Coordinates (Angstroms) |           |           |
|------------------|------------------|----------------|-------------------------|-----------|-----------|
|                  |                  |                | X                       | Y         | Z         |
| 1                | 7                | 0              | -0.956108               | -0.607215 | -0.235177 |
| 2                | 8                | 0              | 0.221380                | 0.800462  | -1.176107 |
| 3                | 1                | 0              | 0.201731                | 0.444642  | -2.069973 |
| 4                | 8                | 0              | -0.099381               | -1.592881 | -0.215418 |
| 5                | 1                | 0              | 0.800239                | -1.319305 | 0.286560  |
| 6                | 6                | 0              | -1.027014               | 0.226383  | 1.009481  |
| 7                | 1                | 0              | -1.359867               | -0.489839 | 1.764863  |
| 8                | 1                | 0              | -0.009244               | 0.534915  | 1.225662  |
| 9                | 8                | 0              | -1.908603               | -0.732121 | -0.931780 |
| 10               | 8                | 0              | 2.077794                | -1.070611 | 0.813636  |
| 11               | 1                | 0              | 2.186282                | -1.110832 | 1.768449  |
| 12               | 1                | 0              | 1.608286                | 1.099829  | -0.739360 |
| 13               | 8                | 0              | 2.565123                | 1.171225  | -0.346582 |
| 14               | 1                | 0              | 2.628138                | 2.005593  | 0.124338  |
| 15               | 1                | 0              | 2.408341                | -0.178670 | 0.484593  |
| 16               | 6                | 0              | -1.975081               | 1.380444  | 0.851660  |
| 17               | 1                | 0              | -2.993694               | 1.039651  | 0.671152  |
| 18               | 1                | 0              | -1.964356               | 1.953742  | 1.779327  |
| 19               | 1                | 0              | -1.651036               | 2.021216  | 0.033791  |

## Standard orientation of Ts-E-j

Cartesian coordinates of all the transition states optimized at the LC- $\omega$ PBE/6-311++G(d,p) level:

Standard orientation of transition state of Ts-E-j

State=1-A

Charge = 1    Multiplicity = 2

Lowest Harmonic Vibrational Frequency (LHVF) = -1403.65 cm<sup>-1</sup>

Standard orientation:

| Center<br>Number | Atomic<br>Number | Atomic<br>Type | Coordinates (Angstroms) |           |           |
|------------------|------------------|----------------|-------------------------|-----------|-----------|
|                  |                  |                | X                       | Y         | Z         |
| 1                | 7                | 0              | 0.284173                | 1.208207  | -0.029597 |
| 2                | 8                | 0              | -1.806551               | 0.139344  | -0.325528 |
| 3                | 8                | 0              | -1.451452               | -0.876033 | 0.187233  |
| 4                | 6                | 0              | 0.864118                | 0.119809  | 0.504860  |
| 5                | 1                | 0              | 1.025483                | 0.201267  | 1.581129  |
| 6                | 1                | 0              | -0.122252               | -0.660027 | 0.551741  |
| 7                | 6                | 0              | 1.884852                | -0.625095 | -0.310395 |
| 8                | 1                | 0              | 2.061851                | -1.608166 | 0.120964  |
| 9                | 1                | 0              | 1.560043                | -0.744448 | -1.344282 |
| 10               | 1                | 0              | 2.822329                | -0.066468 | -0.296840 |
| 11               | 1                | 0              | 0.366825                | 1.419729  | -1.018848 |
| 12               | 1                | 0              | -0.133289               | 1.925888  | 0.552875  |

## Standard orientation of Ts-E-k

Cartesian coordinates of all the transition states optimized at the LC- $\omega$ PBE/6-311++G(d,p) level:

Standard orientation of transition state of Ts-E-k

State=1-A

Charge = 1    Multiplicity = 2

Lowest Harmonic Vibrational Frequency (LHVF) = -599.58 cm<sup>-1</sup>

Standard orientation:

| Center<br>Number | Atomic<br>Number | Atomic<br>Type | Coordinates (Angstroms) |           |           |
|------------------|------------------|----------------|-------------------------|-----------|-----------|
|                  |                  |                | X                       | Y         | Z         |
| 1                | 7                | 0              | -0.079744               | 1.179591  | -0.350099 |
| 2                | 6                | 0              | -0.903435               | -0.005190 | -0.428005 |
| 3                | 1                | 0              | -1.432255               | -0.062156 | -1.381728 |
| 4                | 8                | 0              | 0.008394                | -1.117758 | -0.355934 |
| 5                | 1                | 0              | 0.042887                | -1.578738 | -1.199347 |
| 6                | 1                | 0              | 2.573841                | -0.766893 | 0.873301  |
| 7                | 8                | 0              | 2.343411                | -0.023333 | 0.291211  |
| 8                | 1                | 0              | 2.533786                | 0.822924  | 0.729544  |
| 9                | 1                | 0              | 1.353529                | -0.057918 | 0.015378  |
| 10               | 1                | 0              | -0.414734               | 1.854637  | 0.325173  |
| 11               | 1                | 0              | 0.037760                | 1.641316  | -1.242963 |
| 12               | 6                | 0              | -1.868095               | -0.097454 | 0.727789  |
| 13               | 1                | 0              | -2.586733               | 0.722560  | 0.688857  |
| 14               | 1                | 0              | -2.411147               | -1.040992 | 0.687836  |
| 15               | 1                | 0              | -1.323982               | -0.047291 | 1.673728  |
